# Supplementary material for: Anthropogenically induced environmental changes in the northeastern Adriatic Sea in the last 400 years (Panzano Bay, Gulf of Trieste)
Source: Copernicus journal article supplement (doi:10.5194/bg-2016-273), 2016-07-22
Supplement: Supplementary file 1 [file Table 1.xls]

## Sheet: (a) Species list
Species	Suborder1	Substrate	Tolerance	References	0-4	4-8	8-12	12-16	16-20	20-25	25-30	30-35	35-40	40-45	45-50	50-55	55-60	60-65	65-70	70-75	75-80	80-85	85-90	90-95	95-100	100-105	105-110	110-115	115-120	120-125	125-130	130-135	135-140	140-145	145-150
Reophax sp.	Textulariina	infauna	organic	12, 45, 48, 53, 73	21	8	27	28	31	3	3	1	1	4	5	3	2	2	2	2	4	4	2	0	4	3	2	0	3	0	3	0	0	3	2
Haplophragmoides sp.	Textulariina	epifaunal/infaunal		64, 70	5	14	16	12	12	0	0	4	7	6	4	5	3	9	11	11	11	5	4	8	8	9	4	7	3	4	2	4	3	6	4
Ammoglobigerina globigeriniformis	Textulariina	infaunal		64, 70	0	1	0	0	0	0	0	0	0	0	0	0	0	0	0	0	0	0	1	0	0	0	0	0	0	0	1	0	0	0	0
Eggerelloides scabrus	Textulariina	infaunal	organic	6, 7,18, 31, 45, 48, 52, 53, 57	3	1	2	6	5	2	1	5	4	2	1	0	1	2	0	0	0	0	0	1	1	0	1	2	0	2	0	0	1	0	1
Textularia sp.	Textulariina	epiphytic/infaunal	organic*	26, 46, 51, 57, 63, 69, 76	2	3	11	4	4	4	3	5	4	0	1	0	6	0	2	4	2	2	0	2	3	3	2	0	0	3	1	2	2	2	3
Textularia agglutinans	Textulariina	epiphytic/infaunal	organic	6, 7, 8, 31, 48, 53, 56, 65	2	0	1	0	0	0	1	1	0	1	1	0	0	0	0	0	0	0	0	0	0	0	0	0	0	1	0	0	0	1	2
Textularia bocki	Textulariina	epifaunal/infaunal	organic*	3, 9, 28, 37	0	0	1	0	0	1	0	0	1	0	0	0	0	0	0	0	0	0	0	0	0	1	0	0	0	1	0	0	0	0	2
Textularia porrecta	Textulariina	epifaunal/infaunal	organic	9, 60	3	0	0	0	1	0	2	0	0	2	0	0	0	0	0	0	0	0	0	1	0	0	1	0	0	0	0	0	0	0	1
Spirilina wrightii	Miliolina	epiphytic		8, 57	0	0	0	0	0	0	0	0	2	3	4	1	2	1	1	1	2	0	4	1	0	0	0	3	5	0	3	1	1	0	4
Cornuspira foliacea	Miliolina	epifaunal		64	1	5	0	0	0	0	0	0	0	0	0	0	0	0	0	0	0	0	0	0	0	0	0	0	0	0	0	0	0	0	0
Cornuspira involvens	Miliolina	epifaunal/infaunal		63, 64	2	0	0	5	8	8	6	15	12	6	15	10	8	10	14	5	16	5	11	8	6	15	14	11	12	3	3	13	12	6	6
Adelosina sp.	Miliolina	epiphytic		46, 56, 57	9	9	6	9	23	18	11	37	22	16	10	14	16	13	13	11	26	8	13	29	0	18	9	8	12	10	7	0	8	4	9
Adelosina laevigata	Miliolina	epiphytic		56	3	2	1	0	2	3	4	9	13	11	3	2	9	9	3	4	1	3	5	7	8	8	6	4	1	2	1	2	1	2	2
Siphonaperta sp.	Miliolina	epiphytic		56	0	0	0	0	0	0	0	0	0	0	0	0	0	0	0	1	0	0	0	0	0	0	0	0	0	0	0	0	0	0	0
Siphonaperta aspera	Miliolina	epiphytic		56	0	0	0	0	0	0	0	0	0	0	0	0	0	0	1	0	0	0	0	0	0	0	0	0	0	0	0	0	0	0	0
Siphonaperta irregularis	Miliolina	epiphytic		56	0	0	0	0	0	0	0	0	0	0	0	0	0	0	0	0	0	0	0	0	0	0	0	0	1	0	0	0	0	0	0
Quinqueloculina sp.	Miliolina	epiphytic/infaunal	organic/chemical*	15, 17, 31, 35, 46, 51, 53, 57, 65, 81	25	10	10	4	9	9	10	18	11	11	2	4	4	10	4	10	6	6	3	5	4	4	7	4	3	8	7	9	0	2	5
Quinqueloculina seminula	Miliolina	epiphytic/infaunal	organic/chemical	1 7, 31, 53, 54, 56, 63, 81	25	1	4	2	8	10	5	7	14	11	15	6	5	8	6	5	7	9	14	7	9	9	7	13	5	9	7	8	3	9	15
Biloculinella elongata	Miliolina	epifaunal		9	0	0	0	0	6	0	9	0	0	0	0	0	0	0	0	0	0	0	0	0	0	0	0	0	0	0	0	6	0	0	0
Milliolinella sp.	Miliolina	epiphytic	organic/chemical	51, 58, 81, 82	18	23	20	28	46	18	21	36	12	9	17	13	23	11	6	14	15	7	10	15	9	13	5	11	13	11	10	9	12	6	15
Miliolinella subrotunda	Miliolina	epiphytic		63, 45, 56	3	1	2	3	9	8	4	5	5	6	2	5	8	6	1	6	6	2	4	1	1	1	2	7	2	7	5	2	0	2	1
Pseudotriloculina laevigata	Miliolina	epiphytic		56	0	0	0	0	1	0	0	0	0	0	0	1	0	0	1	0	0	0	1	0	0	0	0	0	0	0	0	0	0	1	0
Pseudotriloculina oblonga	Miliolina	epiphytic		56	0	0	0	0	1	0	0	0	0	0	0	0	0	0	0	0	0	0	0	0	0	0	0	0	0	0	0	0	0	0	0
Pyrgo elongata	Miliolina	epiphytic		64	0	0	0	0	0	0	0	0	0	0	0	0	0	0	0	0	0	1	0	0	0	0	0	0	0	0	1	0	0	0	0
Triloculina sp.	Miliolina	epiphytic		45, 51, 56, 57, 81, 82	3	15	16	28	21	9	10	11	13	13	19	18	25	14	14	12	14	8	23	13	8	19	16	9	11	6	9	30	6	6	5
Triloculina tricarinata	Miliolina	epiphytic		56	2	7	1	0	2	2	2	0	2	1	0	0	1	2	1	1	2	1	0	1	0	4	5	2	2	2	1	0	1	1	1
Triloculina trigonula	Miliolina	epiphytic	organic	46, 81, 82	0	0	0	0	0	0	0	0	0	0	0	0	0	0	0	0	0	0	0	0	0	0	0	1	0	0	0	0	0	0	0
Sigmoilinita sp.	Miliolina	epifaunal		56	6	0	1	1	0	0	0	0	0	4	0	0	0	1	0	0	0	0	0	0	0	0	0	0	0	0	1	0	0	0	0
Laevidentalina sp.	Rotaliina	infaunal		9	2	0	0	1	0	0	0	0	0	0	0	0	0	0	0	0	0	0	0	0	0	2	0	0	0	0	0	0	0	0	0
Nodosaria sp.	Rotaliina	infaunal		9, 64	0	0	0	0	2	0	0	0	0	0	0	0	0	0	0	0	0	0	0	0	0	0	0	0	0	0	0	0	0	0	0
Lenticulina sp.	Rotaliina	epifaunal/infaunal		64, 75	7	0	0	0	0	0	0	0	0	0	0	0	0	0	0	0	0	0	0	0	0	0	0	0	0	0	0	0	0	0	0
Hyalinonetrion gracillimum	Rotaliina	infaunal		9	5	3	6	3	5	2	1	2	1	0	1	1	0	0	1	0	1	0	0	0	0	6	4	3	0	0	0	0	3	0	0
Lagena striata	Rotaliina	epifaunal/infaunal		9	7	2	1	2	1	0	0	0	0	1	0	2	0	0	0	0	0	0	0	0	0	0	0	0	0	0	0	0	0	0	0
Polymorphina sp.	Rotaliina	infaunal		9	5	2	2	1	2	3	2	3	0	4	1	3	5	2	3	3	1	0	2	2	2	10	4	0	4	3	1	2	3	2	2
Fissurina sp.	Rotaliina	epifaunal		21, 64	0	0	0	0	0	2	10	2	2	1	3	1	3	4	0	0	0	0	0	0	0	0	0	0	0	0	0	0	2	0	3
Fissurina lucida	Rotaliina	epifaunal		21, 64	9	4	5	5	12	0	0	0	0	0	0	0	0	0	0	0	2	0	5	2	3	14	2	0	7	4	0	3	0	0	0
Fissurina orbignyana	Rotaliina	epifaunal		21, 64	0	0	0	0	0	0	0	0	0	0	0	0	0	0	0	0	0	0	0	0	0	0	0	0	0	0	0	0	0	2	0
Epistominella exigua	Rotaliina	epifaunal/infaunal	organic/chemical	12, 48, 64, 69	0	0	0	2	6	13	4	11	0	0	4	5	9	3	3	5	13	4	6	0	0	4	0	6	4	3	2	0	0	0	0
Epistominella vitrea	Rotaliina	epifaunal/infaunal	organic	6, 7, 15, 27, 45, 64, 68,	0	0	0	0	0	0	0	0	0	0	0	0	0	0	0	0	0	1	0	0	0	0	0	0	0	0	0	0	0	0	0
Brizalina sp.	Rotaliina	infaunal	organic*	6	12	19	11	6	0	0	0	3	0	0	6	6	4	4	4	4	5	2	0	2	0	15	0	3	0	4	0	3	3	3	0
Brizalina spathulata	Rotaliina	infaunal	organic	6, 7, 31, 46, 48	22	8	25	16	12	5	5	3	4	0	0	0	0	0	0	0	0	0	0	0	0	0	0	0	0	0	0	0	0	0	0
Brizalina striatula	Rotaliina	epifaunal/infaunal	organic	7, 14, 45, 48	8	2	8	8	3	2	2	4	4	6	8	6	4	3	4	6	5	0	4	6	0	5	2	4	6	3	2	6	4	4	4
Bulimina sp.	Rotaliina	infaunal	organic	8, 15, 31, 46, 57, 76	0	0	0	0	0	0	0	0	2	0	0	0	0	0	0	0	0	0	0	0	0	0	0	0	0	0	0	0	0	0	0
Bulimina aculeata	Rotaliina	infaunal	organic	8, 45, 46, 52, 73	0	1	0	0	2	0	0	1	1	1	0	4	0	1	0	0	0	0	0	0	0	0	0	0	0	0	0	0	0	1	1
Bulimina elongata	Rotaliina	infaunal*	organic	65	8	10	17	18	6	0	0	0	5	4	8	4	8	12	6	4	9	2	4	3	2	10	6	3	3	7	7	0	3	4	2
Bulimina marginata	Rotaliina	infaunal	organic	6, 7, 8, 27, 31, 46, 48, 53, 69, 76	4	4	10	6	2	3	8	12	1	4	0	4	8	5	3	5	6	3	2	5	6	3	1	6	0	3	2	4	3	0	6
Uvigerina sp.	Rotaliina	epifaunal/infaunal	organic*	46, 64, 73	0	2	14	18	14	3	4	2	0	4	3	4	0	0	3	0	0	2	0	0	0	0	0	0	0	0	0	0	0	0	0
Reussela spinulosa	Rotaliina	epifaunal		7, 8, 31, 46	0	0	0	0	0	0	0	0	0	0	0	0	0	0	0	0	0	0	0	0	0	1	0	0	0	0	0	0	0	0	0
Valvulineria sp.	Rotaliina	infaunal	organic	8, 31, 46	4	3	7	9	14	19	28	40	95	54	46	58	60	66	104	104	126	37	77	49	40	34	45	88	42	108	99	50	22	69	56
Rosalina sp.	Rotaliina	epiphytic		3, 8, 38, 51, 56, 81	3	0	5	4	2	1	1	2	1	4	2	0	0	0	0	1	0	0	0	7	3	2	2	4	5	2	0	6	2	3	2
Rosalina bradyi	Rotaliina	epiphytic		8, 30, 46, 56, 57	0	2	0	0	0	0	0	0	0	0	0	0	0	0	0	0	0	0	0	0	0	0	1	0	0	0	0	0	0	0	0
Rosalina macropora	Rotaliina	epiphytic		51, 56, 57	0	0	0	0	0	0	0	0	0	0	0	0	0	0	0	0	0	0	0	0	0	0	0	0	1	0	0	0	0	0	0
Planorbulina mediterranensis	Rotaliina	epiphytic		8, 51, 56, 57, 82	0	0	0	0	0	0	0	0	0	0	0	0	0	0	0	0	0	0	0	0	0	0	0	0	0	0	0	0	0	0	1
Nonionella sp.	Rotaliina	epifaunal/infaunal	organic	6, 7, 8, 26, 27, 33, 34, 45, 46, 48, 65, 76	0	17	25	26	33	9	27	37	39	33	35	34	63	38	32	38	70	25	34	30	16	41	10	17	18	13	39	34	53	34	32
Nonionella opima	Rotaliina	infaunal	organic	9, 31, 64, 66	1	0	1	2	0	0	2	0	0	0	1	1	3	2	3	2	4	2	2	0	4	4	0	2	2	4	4	2	1	1	0
Buccella sp.	Rotaliina	epiphytic/infaunal		7, 26, 46, 57	0	0	0	0	0	0	0	0	0	0	0	0	0	0	0	0	0	0	0	0	0	0	3	1	0	1	0	0	0	5	3
Ammonia sp.	Rotaliina	epifaunal/infaunal*	organic/chemical	29, 46, 50, 57	44	38	55	45	28	10	35	34	34	38	34	27	37	41	37	24	62	20	42	30	22	57	40	29	35	31	48	0	36	32	23
Ammonia beccarii	Rotaliina	epifaunal (epiphytic)/infaunal	organic/chemical	1, 6, 22, 26, 31, 32, 38, 42, 46, 56, 57, 63, 72, 79, 84	0	1	1	1	0	1	0	0	0	0	0	1	1	2	2	1	0	0	1	1	1	0	0	0	0	0	2	1	0	2	0
Ammonia inflata	Rotaliina	infaunal	organic/chemical	43, 58	14	8	5	0	6	0	8	9	15	1	5	8	11	11	7	13	7	6	3	20	6	24	18	9	10	9	18	10	4	14	5
Ammonia tepida	Rotaliina	epifaunal/infaunal	organic/chemical	2, 5, 11, 14, 18, 40, 45, 56, 22, 23, 29, 30, 35, 39, 55, 59, 65, 69, 74, 81, 83	15	11	28	18	22	24	26	27	29	17	27	18	36	32	17	17	30	14	37	44	19	27	28	41	19	12	44	42	39	35	29
Elphidium sp. (non-keeled)	Rotaliina	infaunal	organic/chemical*	4, 26, 27, 31, 37, 45, 46, 49, 50, 57	10	13	17	17	20	24	43	66	106	67	65	69	58	47	51	32	52	19	63	38	39	52	74	56	30	70	48	89	31	102	65
Elphidium sp. (keeled)	Rotaliina	epiphytic		8, 15, 37, 46, 49, 51, 57, 79	0	0	0	0	0	0	0	0	0	0	0	0	0	0	0	1	0	1	3	2	2	2	5	6	1	4	1	1	0	7	2
Elphidium advenum	Rotaliina	epiphytic		7, 44, 46, 51, 56, 77, 81	16	9	32	22	20	6	31	40	19	10	15	9	16	11	10	12	4	4	19	16	7	27	15	17	11	7	14	24	16	22	22
Elphidium macellum	Rotaliina	epiphytic		38, 51, 56, 57, 64	0	0	1	0	0	0	0	0	0	0	0	0	0	0	0	0	0	0	0	0	0	0	0	0	0	0	0	0	0	0	0
Elphidium translucens	Rotaliina	infaunal	organic	62, 64, 78	0	1	0	0	1	0	0	0	0	0	0	0	0	0	0	0	0	0	0	0	0	0	0	0	0	0	0	0	0	0	0
Haynesina sp.	Rotaliina	epifaunal/infaunal	organic/chemical	1, 5, 12, 13, 14, 16, 19, 20, 24, 26, 31, 41, 54, 57, 71, 74, 78, 79, 80	75	82	93	58	76	42	82	93	67	50	31	60	86	55	54	55	68	25	42	92	46	105	55	33	32	31	44	55	74	44	54
Haynesina depressula	Rotaliina	infaunal	organic/chemical	5, 10, 16, 17, 27, 41, 46, 59, 67, 69, 77, 78, 79	2	4	4	3	6	7	9	12	25	17	17	13	15	9	9	6	13	9	27	17	30	22	21	17	8	18	7	28	7	28	14
Nonion sp.	Rotaliina	infaunal	organic	8, 12, 25, 29, 36, 46, 61	20	16	30	27	32	18	45	33	24	10	19	10	19	13	11	10	12	4	9	10	8	9	9	11	11	7	22	6	14	12	5
1 following suprageneric classification of Loeblich & Tappan (1987) and Cimerman & Langer (1991)
Row 6 - * determined based on species tolerance
Row 11 - * determined based on ecology of C. involvens
Row 15 - * determined based on ecology of S. aspera and S. irregularis
Row 18 - * determined based on species tolerance
Row 41 - * determined based on species tolerance
Row 46 - * determined based on group habitat
Row 48 - * determined based on species tolerance
Row 58 - * based on habitat preferences of A.inflata and A. tepida
Row 62 - * based on species tolerance
Row 65 - * substrate relation determined based on morphology: keeled and non-keeled
Row 68- * based on substrate relation of entire group

## Sheet: (b) References
	References for Table 1
1	Albani, A., Serandrei Barbero, R. and Donnici, S.: Foraminifera as ecological indicators in the Lagoon of Venice, Italy. Ecol. Indic., 7, 239–253, doi:10.1016/j.ecolind.2006.01.003, 2007.
2	Alve, E.: Benthic foraminiferal responses to estuarine pollution: a review, J. Foraminifer. Res., 25, 190–203, doi:10.2113/gsjfr.25.3.190, 1995.
3	Alve, E., Korsun, S., Schönfeld, J., Dijkstra, N., Golikova, E., Hess, S., Husum, K. and Panieri, G.: Foram-AMBI: A sensitivity index based on benthic foraminiferal faunas from North-East Atlantic and Arctic fjords, continental shelves and slopes, Mar. Micropalaeontol., 122, 1–12, doi:10.1016/j.marmicro.2015.11.001, 2016.
4	Alves Martins, M.V., Hohenegger, J., Frontalini, F., Miranda, P., da Conceição Rodrigues, M.A. and Alveirinho Dias, J.M.: Comparison between the dead and living benthic foraminiferal assemblages in Aveiro Lagoon (Portugal). Palaeogeogr. Palaeoclimatol. Palaeoecol., 455, 16–32, doi:10.1016/j.palaeo.2016.05.003, 2016.
5	Armynot du Châtelet, E., Debenay, J.P. and Soulard, R.: Foraminiferal Proxies from pollution monitoring in moderately polluted harbors, Environ. Pollut., 127, 27-40, doi.org/10.1016/S0269-7491(03)00256-2, 2004.
6	Barmawidjaja, D.M., Jorissen, F.J., Puskaric, S. and Van der Zwaan, G.J.: Microhabitat selection by benthic foraminifera in the Northern Adriatic Sea, J. Foraminifer. Res., 22, 297-317, doi:10.2113/gsjfr.22.4.297, 1992.
7	Barmawidjaja, D.M., Van der Zwaan, G.J., Jorissen, F.J. and Puškarić, S.: 150 years of eutrophication in the northern Adriatic Sea: Evidence from a benthic foraminiferal record, Mar. Geol., 122, 367-384, doi:10.1016/0025-3227(94)00121-Z, 1995.
8	Barras, C., Jorissen, F.J., Labrune, C., Andral, B. and Boissery, P.: Live benthic foraminiferal faunas from the French Mediterranean Coast: Towards a new biotic index of environmental quality, Ecol. Indic., 36, 719-743, doi:10.1016/j.ecolind.2013.09.028, 2014.
9	Behrensmeyer, A.K. and Turner, A.: Taxonomic occurrences of Suidae recorded in the Paleobiology Database, Fossilworks http://fossilworks.org, 2013.
10	Bergamin, L., Romano, E., Finoia, M.G., Venti, F., Bianchi, J., Colasanti, A. and Ausili, A.: Benthic foraminifera from the coastal zone of Baia (Naples, Italy): Assemblage distribution and modification as tools for environmental characterisation. Mar. Pollut. Bull., 59, 234–244, doi:10.1016/j.marpolbul.2009.09.015, 2009.
11	Bergin, F., Kucuksezgin, F., Uluturhan, E., Barut, I.F., Meric, E., Avsar, N. and Nazik A.: The response of benthic foraminifera and ostracoda to heavy metal pollution in Gulf of Izmir (Eastern Aegean Sea). Estuar. Coastal Shelf Sci., 66, 368-386, doi:10.1016/j.ecss.2005.09.013, 2006.
12	Bernhard, J.M. and Bowser, S.S.: Benthic foraminifera of dysoxic sediments: chloroplast sequestration and functional morphology. Earth-Sci. Rev., 46, 49–165, doi:10.1016/S0012-8252(99)00017-3, 1999.
13	Bouchet, V.M.P., Debenay, J.P., Sauriau, P.G., Radford-Knoery, J. and Soletchnik, P.: Effects of short-term environmental disturbances on living benthic foraminifera during the Pacific oyster summer mortality in the Marennes-Oléron Bay (France). Mar. Environ. Res., 64, 358–383, doi:10.1016/j.marenvres.2007.02.007, 2007.
14	Bouchet, V.M.P., Sauriau, P.G., Debenay, J.P., Mermillod-Blondin, F., Schmidt, S., Amiard, J.C. and Dupas, B.: Influence of the mode of macrofauna-mediated bioturbation on the vertical distribution of living benthic foraminifera: First insight from axial tomodensitometry. J. Exp. Mar. Biol. Ecol., 371, 20-33, doi:10.1016/j.jembe.2008.12.012, 2009.
15	Capotondi, L., Bergami, C., Orsini, G., Ravaioli, M., Colantoni, P. and Galeotti, S.: Benthic foraminifera for environmental monitoring: a case study in the central Adriatic continental shelf. Environ. Sci. Pollut. Res., 22, 6034–6049, doi:10.1007/s11356-014-3778-7, 2015.
16	Carboni, M.G., Succi, M.C., Bergamin, L., Di Bella, L., Frezza, F. and Landini, B.: Benthic foraminifera from two coastal lakes of southern Latium (Italy). Preliminary evaluation of environmental quality. Mar. Pollut. Bull., 59, 268–280, doi:10.1016/j.marpolbul.2009.08.010, 2009.
17	Celia Magno, M., Bergamin, L., Finoia, M.G., Pierfranceschi, G., Venti, F. and Romano, E.: Correlation between textural characteristics of marine sediments and benthic foraminifera in highly anthropogenically-altered coastal areas. Mar. Geol., 315-318, 143–161, doi:10.1016/j.margeo.2012.04.002, 2012.
18	Cesbron, F., Geslin, E., Jorissen, F.J., Delgard, M.L., Charrieau, L., Deflandre, B., Jézéquel, D., Anschutz, P. and Metzger, E.: Vertical distribution and respiration rates of benthic foraminifera: Contribution to aerobic remineralization in intertidal mudflats covered by Zostera noltei meadows. Estuar. Coastal Shelf Sci., in press, doi:10.1016/j.ecss.2015.12.005, 2016.
19	Cherchi, A., Da Pelo, S., Ibba, A., Mana, D., Buosi, C. and Floris, N.: Benthic foraminifera response and geochemical characterization of the coastal environment surrounding the polluted industrial area of Portovesme (South-Western Sardinia, Italy). Mar. Pollut. Bull., 59, 281–296, doi:10.1016/j.marpolbul.2009.09.016, 2009.
20	Coccioni, R., Frontalini, F., Marsili, A. and Mana, D.: Benthic foraminifera and trace element distribution: a case-study from the heavily polluted lagoon of Venice (Italy), Mar. Pollut. Bull., 59, 257-267, doi:10.1016/j.marpolbul.2009.08.009, 2009.
21	Collen, J.D. and Newell, P.: Fissurina as an ectoparasite. J. Micropalaeontol., 18, 0-10., doi:10.1144/jm.18.2.110. 1999.
22	Debenay, J.P., Bé́néteau, E., Zhang, J., Stouff, F., Geslin, E., Redois, F. and Fernandez-Gonzalez, M.: Ammonia beccarii and Ammonia tepida (Foraminifera): morphofunctional arguments for their distinction. Marine Micropaleontol., 34, 235–244, doi:10.1016/S0377-8398(98)00010-3, 1998.
23	Debenay, J.P., Geslin, E., Eichler, B.B., Duleba, W., Sylvestre, F. and Eichler, P.: Foraminiferal assemblages in a hypersaline lagoon: the lagoon of Araruama (R.J.) Brazil. J. Foramin. Res., 31, 133–151, doi:10.2113/0310133, 2001.
24	Debenay, J.P., Millet, B. and Angelidis, M.O.: Relationships between foraminiferal assemblages and hydrodynamics in the Gulf of Kalloni, Greece. J. Foramin. Res., 35, 327–343, doi:10.2113/35.4.327, 2005.
25	Dessandier, P.A., Bonnin, J., Kim, J.H., Bichon, S., Grémare, A., Deflandre, B., de Stigter, H. and Malaizé, B.: Lateral and vertical distributions of living benthic foraminifera off the Douro River (western Iberian margin): Impact of the organic matter quality. Mar. Micropaleontol., 120, 31–45, doi:10.1016/j.marmicro.2015.09.002, 2015.
26	Di Bella, L., Casieri, S. and Carboni, M.G.: Late Quaternary paleoenvironmental reconstruction of the Tremiti structural high (Central Adriatic Sea) from benthic foraminiferal assemblages, Geobios, 41, 729–742, doi:10.1016/j.geobios.2008.06.001, 2008.
27	Di Bella, L. and Casieri, S.: The Late Glacial–Holocene record from Central Adriatic Sea: Paleoenvironmental reconstruction based on benthic foraminiferal assemblages, Geobios, 46, 473–489, doi:10.1016/j.geobios.2013.09.001, 2013.
28	Di Bella, L., Frezza, V., Bergamin, L., Carboni, M.G., Falese, F., Martorelli, E., Tarragoni, C., and Chiocci, F.L.: Foraminiferal record and high-resolution seismic stratigraphy of the Late Holocene succession of the submerged Ombrone River delta (Northern Tyrrhenian Sea, Italy). Quat. Int., 328-329, 287-300, doi:10.1016/j.quaint.2013.09.043, 2014.
29	Dimiza, M.D., Triantaphyllou, M.V., Koukousioura, O., Hallock, P., Simboura, N., Karageorgis, A.P. and Papathanasiou, E.: The Foram Stress Index: A new tool for environmental assessment of soft-bottom environments using benthic foraminifera. A case study from the Saronikos Gulf, Greece, Eastern Mediterranean, Ecol. Indic., 60, 611–62, doi:10.1016/j.ecolind.2015.07.030, 2016.
30	Dimiza, M.D., Koukousioura, O., Triantaphyllou, M.V. and Dermitzakis, M.D.: Live and dead benthic foraminiferal assemblages from coastal environments of the Aegean Sea (Greece): Distribution and diversity. Rev. Micropaleontol., 59, 19–32, doi:10.1016/j.revmic.2015.10.002, 2016a.
31	Donnici, S. and Serandrei Barbero, R.: The benthic foraminiferal communities of the northern Adriatic continental shelf, Mar. Micropalaeontol., 44, 93-123, doi:10.1016/S0377-8398(01)00043-3, 2002.
32	Donnici, S., Serandrei-Barbero, R., Bonardi, M. and Sperle, M.: Benthic foraminifera as proxies of pollution: The case of Guanabara Bay (Brazil). Mar. Pollut. Bull., 64, 2015–2028, doi:10.1016/j.marpolbul.2012.06.024, 2012.
33	Duffield, C.J., Hess, S., Norling, K. and Alve, E.: The response of Nonionella iridea and other benthic foraminifera to “fresh” organic matter enrichment and physical disturbance. Mar. Micropaleontol., 120, 20–30, doi:10.1016/j.marmicro.2015.08.002, 2015.
34	Ernst, S., Duijnstee, I. and van der Zwaan, B. The dynamics of the benthic foraminiferal microhabitat: recovery after experimental disturbance. Mar. Micropalaeontol., 46:343-361, doi:10.1016/S0377-8398(02)00080-4, 2002.
35	Ferraro, L., Sprovieri, M., Alberico, I., Lirer, F., Prevedello, L. and Marsella, E.: Benthic foraminifera and heavy metals distribution: a case study from the Naples Harbour (Tyrrhenian Sea, Southern Italy), Environ. Pollut., 142, 274–284, doi:10.1016/j.envpol.2005.10.026, 2006.
36	Fontanier, C., Jorissen, F.J., Licari, L., Alexandre, A., Anschutz, P. and Carbonel, P.: Live benthic foraminiferal faunas from the Bay of Biscay: faunal density, composition, and microhabitats. Deep Sea Res. I, 49, 751–785, doi:10.1016/S0967-0637(01)00078-4, 2002.
37	Frezza, V and Carboni. M.G.: Distribution of recent foraminiferal assemblages near the Ombrone River mouth (Northern Tyrrhenian Sea, Italy) Rev. Micropaleontol., 52, 43–66, doi:10.1016/j.revmic.2007.08.007, 2009.
38	Frezza, V., Mateu-Vicens, G., Gaglianone, G. and Brandano, M.: Mixed carbonate-siliclastic sediments and benthic foraminiferal assemblages from Posidonia oceanica seagrass meadows of the central Tyrrhenian continental shelf (Latium, Italy). Ital. J. Geosci., 130, 352-369, doi:10.3301/IJG.2011.07, 2011.
39	Frontalini, F,. Buosi, C., Da Pelo, S., Coccioni, R., Cherchi, A. and Bucci, C.: Benthic foraminifera as bio-indicators of trace element pollution in the heavily contaminated Santa Gilla lagoon (Cagliari, Italy). Mar. Pollut. Bull., 58, 858–877, doi:10.1016/j.marpolbul.2009.01.015, 2009.
40	Frontalini, F. and Coccioni, R.: Benthic foraminifera for heavy metal pollution monitoring: a case study from the central Adriatic Sea coast of Italy, Estuar. Coast Shelf Sci., 76, 404-417, doi:10.1016/j.ecss.2007.07.024, 2008.
41	Frontalini, F. and Coccioni, R.: Benthic foraminifera as bioindicators of pollution: A review of Italian research over the last three decades, Rev. Micropaleontolog, 54, 115-127, doi:10.1016/j.revmic.2011.03.001, 2011.
42	Goldstein, S.T., Todd Watkins, G. and Kuhn, R.M.: Microhabitats of salt marsh foraminifera: St. Catherines Island, Georgia, USA. Mar. Micropaleontol., 26, 17-29, doi:10.1016/0377-8398(95)00006-2, 1995.
43	González-Regalado, M.V., Ruiz. F., Baceta, J.I., González-Regalado, E. and Muñoz, J.M.: Total benthic foraminifera assemblages in the southwestern Spanish estuaries. Geobios 34:39-51, doi:10.1016/S0016-6995(01)80042-5, 2001.
44	Hayward, B.W. and Grenfell, H.R.: Chatham Island foraminifera (Protista), New Zealand. New Zealand Natural Sciences 24:69-88, 1999.
45	Hohenegger, H., Piller, W.E. and Baal, C.: Horizontal and vertical spatial microdistribution of foraminifers in the shallow subtidal Gulf of Trieste, northern Adriatic Sea, J. Foraminifer., Res., 23, 79-101, doi:10.2113/gsjfr.23.2.79, 1993.
46	Jorissen, F.J.: The distribution of benthic foraminifera in the Adriatic Sea, Mar. Micropaleontol., 12, 21-48, doi:10.1016/0377-8398(87)90012-0, 1987.
47	Jorissen, F.J.: Benthic foraminifera from the Adriatic Sea: principles of phenotypic variation, Utrecht Micropaleontol. Bull., 37, 1-174, 1988.
48	Jorissen, F.J., Barmawidjaja, D.M., Puskaric, S. and Van der Zwaan, G.J.: Vertical distribution of benthic foraminifera in the northern Adriatic Sea: The relation with the organic flux, Mar. Micropaleontol., 19, 131-146, doi:10.1016/0377-8398(92)90025-F, 1992.
49	Koukousioura, O., Triantaphyllou, M.V., Dimiza, M.D., Pavlopoulos, K., Syrides, G. and Vouvalidis, K.: Benthic foraminiferal evidence and paleoenvironmental evolution of Holocene coastal plains in the Aegean Sea (Greece). Quat. Int., 261, 105-117, doi:10.1016/j.quaint.2011.07.004, 2012.
50	Langer, M.R., Hottinger, L. and Huber, B.: Functional morphology in low-diverse benthic foraminiferal assemblages from tidal flats of the North Sea. Senckenbergiana marit., 20, 81-99, 1989.
51	Langer, M.R.: Epiphytic Foraminifera, Mar. Micropaleontol., 20, 235-265, doi: 10.1016/0377-8398(93)90035-V, 1993.
52	Langlet, D., Geslin, E., Baal, C., Metzger, E., Lejzerowicz, F., Riedel, B., Zuschin, M., Pawlowski, J., Stachowitsch, M. and Jorissen, F.J.: Foraminiferal survival after one year of experimentally induced anoxia, Biogeosciences, 10, 7463-7480, doi:10.5194/bg-10-7463-2013, 2013.
53	Langlet, D., Baal, C., Geslin, E., Metzger, E., Zuschin, M., Riedel, B., Risgaard-Petersen, N., Stachowitsch, M. and Jorissen, F.J.: Foraminiferal specific responses to experimentally induced anoxia in the Adriatic Sea, Biogeosciences, 11, 1775-1797, doi: 10.5194/bg-11-1775-2014, 2014.
54	Martins, V., Yamashita, C., Sousa, S.H.M., Martins, P., Laut, L.L.M., Figueira, R.C.L., Mahiques, M.M., Ferreira da Silva, E., Alveirinho Dias, J.M. and Rocha, F.: The response of benthic foraminifera to pollution and environmental stress in Ria de Aveiro (N Portugal). J. Iber. Geol., 37, 231-246, doi: 10.5209/rev_JIGE.2011.v37.n2.10, 2011.
55	Martins, M.V.A., Hohenegger, C., Frontalini, F., Miranda, P., da Conceição Rodrigues, M.A. and Dias, J.M.A.: Comparison between the dead and living benthic foraminiferal assemblages in Aveiro Lagoon (Portugal). Palaeogeogr. Palaeoclimatol. Palaeoecol., 455, 16–32, doi:10.1016/j.palaeo.2016.05.003, 2016.
56	Mateu-Vicens, G., Box, A., Deudero, S. and Rodriguez, B.: Comparative analysis of epiphytic foraminifera in sediments colonized by seagrass Posidonia oceanica and invasive macroalgae Caulerpa spp., J. Foraminifer. Res., 40, 134-147, doi: 10.2113/gsjfr.40.2.134, 2010.
57	Mateu-Vincens, G., Khokhlova, A. and Sebastian-Pastor, T.: Epiphytic foraminiferal indices as bioindicators in Mediterranean seagrass meadows. J. Foramin. Res., 44, 325-339, doi:10.2113/gsjfr.44.3.325, 2014.
58	Melis, R. and Violanti, D.: Foraminiferal biodiversity and Holocene evolution of the Phetchaburi coastal area (Thailand Gulf). Mar. Micropaleontol., 61, 94–115, doi:10.1016/j.marmicro.2006.05.006, 2006.
59	Melis, R. and Covelli, S.: Distribution and morphological abnormalities of recent foraminifera in the Marano and Grado Lagoon (North Adriatic Sea, Italy), Mediterr. Mar. Sci., 14, 432-450, doi:10.12681/mms.351, 2013.
60	Mojtahid, M., Jorissen, F., Lansard, B., Fontanier, C., Bombled, B. and Rabouille, C.: Spatial distribution of live benthic foraminifera in the Rhône prodelta: Faunal response to a continental–marine organic matter gradient. Mar. Micropaleontol., 70, 177–200, doi:10.1016/j.marmicro.2008.12.006, 2009.
61	Mojtahid, M., Griveaud, C., Fontanier, C., Anschutz, P. and Jorissen, F.J.: Live benthic foraminiferal faunas along a bathymetrical transect (140–4800 m) in the Bay of Biscay (NE Atlantic). Rev. Micropaleontol., 53, 139–162, doi:10.1016/j.revmic.2010.01.002, 2010.
62	Murray, J.W.: Ecology and palaeoecology of benthic foraminifera. John Wiley and Sons Inc, New York, 402 pp doi: 10.1016/0031-0182(92)90153-V, 1991.
63	Murray, J.W.: An illustrated guide to the benthic foraminifera of the Hebridean shelf, west of Scotland, with notes on their mode of life. Palaeontol. Electron., 5(2), 1-31, http://palaeo-electronica.org/paleo/2002_2/guide/issue2_02.htm, 2003.
64	Murray, J.W.: Ecology and applications of benthic foraminifera. Cambridge University Press, Cambridge, 426 pp doi: http://dx.doi.org/10.1017/CBO9780511535529, 2006.
65	Naeher, S., Geraga, M., Papatheodorou, G., Ferentinos, G., Kaberi, H. and Schubert, C.J.: Environmental variations in a semi-enclosed embayment (Amvrakikos Gulf, Greece) - reconstructions based on benthic foraminifera abundance and lipid biomarker pattern, Biogeosciences, 9, 5081-5094, doi: 10.5194/bg-9-5081-2012, 2012.
66	Osterman, L.E.: Benthic foraminifers from the continental shelf and slope of the Gulf of Mexico: an indicator of shelf hypoxia. Estuar. Coastal Shelf Sci., 58, 17–35, doi:10.1016/S0272-7714(02)00352-9, 2003.
67	Phipps, M.D., Kaminski, M.A. and Aksu, A.E.: Calcareous benthic foraminiferal biofacies along a depth transect on the southwestern Marmara shelf (Turkey). Micropaleontology, 56, 377-392, doi:10.2307/40959490, 2010.
68	Platon, E., Sen Gupta, B.K., Rabalais, N.N. and Turner, R.E.: Effect of seasonal hypoxia on the benthic foraminiferal community of the Louisiana inner continental shelf: The 20th century record. Mar. Micropaleontol., 54, 263-283, doi:10.1016/j.marmicro.2004.12.004, 2005.
69	Popadić, A., Vidović, J., Ćosović, V., Medaković, D., Dolenec, M. and Felja, I.: Impact evaluation of the industrial activities in the Bay of Bakar (Adriatic Sea, Croatia): recent benthic foraminifera and heavy metals, Mar. Pollut. Bull., 76, 333–348, doi:10.1016/j.marpolbul.2013.09.039, 2013.
70	Reolid, M., Rodríguez-Tovar, F.J. and Nagy, J.: Ecological replacement of Valanginian agglutinated foraminifera during a maximum flooding event in the Boreal realm (Spitsbergen). Cretaceous Res 33:196-204, doi:10.1016/j.cretres.2011.10.003, 2012.
71	Romano, E., Bergamin, L., Finoia, M.G., Carboni, M.G., Ausili, A. and Gabellini, M.: Industrial pollution at Bagnoli (Naples, Italy): benthic foraminifera as a tool in integrated programs of environmental characterization, Mar. Pollut. Bull., 56, 439-457. doi:10.1016/j.marpolbul.2007.11.003, 2008.
72	Samir, A.M. and El-Din, A.B.: Benthic foraminiferal assemblages and morphological abnormalities as pollution proxies in two Egyptian bays. Mar. Micropaleontol., 41, 193–227, doi:10.1016/S0377-8398(00)00061-X, 2001.
73	Schmiedl, G., de Bovée, F., Buscail, R., Charrière, B., Hemleben, C., Medernach, L. and Picon, P.: Trophic control of benthic foraminiferal abundance and microhabitat in the bathyal Gulf of Lions, western Mediterranean Sea. Mar. Micropaleontol., 40, 167–188, doi:10.1016/S0377-8398(00)00038-4, 2000.
74	Seuront, L., Bouchet, V.M.P.: The devil lies in details: New insights into the Behavioural ecology of intertidal foraminifera. J. Foramin. Res., 45, 390–401, doi:10.2113/gsjfr.45.4.390, 2015.
75	Tyszka, J.: Response of Middle Jurassic benthic foraminiferal morphogroups to dysoxic/anoxic conditions in the Pieniny Klippen Basin, Polish Carpathians. Palaeogeogr. Palaeoclimatol. Palaeoecol., 110, 55-81, http://dx.doi.org/10.1016/0031-0182(94)90110-4, 1994.
76	Van der Zwaan, G.J. and Jorissen, F.J.: Biofacial patterns in river-induced shelf anoxia, in: Modern and Ancient Continental Shelf Anoxia. Geological Society, Spec. Publ., 58, 65–82 edited by Tyson, R.V. and Pearson T.H., doi: 10.1144/GSL.SP.1991.058.01.05, 1991.
77	Vaniček, V., Juračić, M., Bajraktarević, Z. and Ćosović, V.: Benthic foraminiferal assemblages in a restricted environment – An example from the Mljet Lakes (Adriatic Sea, Croatia), Geol. Croat., 53, 269–279, url: http://hrcak.srce.hr/3863, 2000.
78	Vidović, J., Ćosović, V., Juračić, M. and Petricioli, D.: Impact of fish farming on foraminiferal community, Drvenik Veliki Island, Adriatic Sea, Croatia, Mar. Pollut. Bull., 58, 1297-1309, doi:10.1016/j.marpolbul.2009.04.031, 2009.
79	Vidović, J., Dolenec, M., Dolenec, T., Karamarko, V. and Žvab Rožič, P.: Benthic foraminifera assemblages as elemental pollution bioindicator in marine sediments around fish farm (Vrgada Island, Central Adriatic, Croatia), Mar. Pollut. Bull., 83, 198-213, doi: 10.1016/j.marpolbul.2014.03.051, 2014.
80	Ward, J.N., Pond, D.W. and Murray, J.W.: Feeding of benthic foraminifera on diatoms and sewage-derived organic matter: an experimental application of lipid biomarker techniques, Mar. Environ. Res., 56, 515-530, doi: 10.1016/S0141-1136(03)00040-0, 2003.
81	Wilson, B.: Guilds among epiphytal foraminifera on fibrous substrates, Nevis, West Indies. Mar. Micropaleontol., 63, 1-18, doi:10.1016/j.marmicro.2006.10.001, 2007.
82	Wilson, B. and Ramsook, A.: Population densities and diversities of epiphytal foraminifera on nearshore substrates, Nevis, West Indies. J. Foramin. Res., 37, 213-222, doi:10.2113/gsjfr.37.3.213, 2007.
83	Yanko. V., Arnold, A. and Parker, W.: Effect of marine pollution on benthic foraminifera, in: Modern Foraminifera, 217–235, edited by: Sen Gupta, B.K., Kluwer Academic, Great Britain, doi:10.1007/0-306-48104-9, 1999.
84	Yasuhara, M. and Yamazaki, H.: The impact of 150 years of anthropogenic pollution on the shallow marine ostracode fauna, Osaka Bay, Japan. Mar. Micropaleontol., 55, 63-74, doi:10.1016/j.marmicro.2005.02.005, 2005.

## Sheet: (c) Rarefied diversity
Sample	Species richness	Shannon index (H)	exp(H)	Fisher's alpha
0-4	36.378	3.0938	22.0838	11.9339
4-8	34.799	2.95793	19.2767	11.1917
8-12	32.907	3.01144	20.3396	10.3326
12-16	32.774	3.06824	21.5223	10.2691
16-20	35.803	3.1337	22.9843	11.6656
20-25	31.316	3.04083	20.929	9.61909
25-30	31.418	2.90516	18.2885	9.66997
30-35	29.674	2.90592	18.3026	8.92125
35-40	28.303	2.76448	15.8957	8.3514
40-45	31.575	2.89865	18.1675	9.73821
45-50	30.367	2.93151	18.7714	9.21609
50-55	31.533	2.85147	17.3343	9.72006
55-60	29.598	2.85891	17.4656	8.88777
60-65	30.862	2.91295	18.4314	9.42723
65-70	30.798	2.72052	15.2091	9.40175
70-75	30.689	2.77539	16.0675	9.35315
75-80	27.925	2.69138	14.7755	8.19348
80-85	30.982	2.95961	19.2906	9.47165
85-90	28.812	2.80011	16.4645	8.55879
90-95	28.744	2.81363	16.6881	8.53175
95-100	28.054	2.84174	17.1545	8.24028
100-105	31.949	2.96727	19.4629	9.90283
105-110	30.789	2.84195	17.1683	9.39646
110-115	30.925	2.85755	17.4381	9.45254
115-120	30.674	2.98807	19.8575	9.3426
120-125	32.349	2.70575	14.9906	10.0783
125-130	28.476	2.6688	14.4408	8.42332
130-135	26.148	2.66427	14.3731	7.47724
135-140	27.506	2.65314	14.2112	8.02064
140-145	30.172	2.69777	14.8689	9.13533
145-150	32.694	2.81908	16.7823	10.2361
