# Supplementary material for: Anthropogenically induced environmental changes in the northeastern Adriatic Sea in the last 400 years (Panzano Bay, Gulf of Trieste)
Source: Copernicus journal article supplement (doi:10.5194/bg-2016-273), 2016-07-22
Supplement: Supplementary file 2 [file Table 2.xls]

## Sheet: Sheet1
SampleID	Depth	Hg mg/Kg	Cr mg/Kg	Cu mg/Kg	Ni mg/Kg	Pb mg/Kg	As mg/Kg	Cd mg/Kg	Li mg/Kg	Zn mg/Kg	Mn mg/Kg	P mg/Kg	Fe mg/Kg	Al mg/Kg	PAH ng/g	PCB ng/g	C tot % ss	TOC % ss	N tot % ss
pa0_T	0-2	8.2209	49.9529	29.6203	51.9611	27.9887	4.26734	0.25102	72.4192	101.663	409.162	469.407	21374.3	22290.6	283.019	4.46817	8.22	1.61	0.143
pa4_T	4-6	10.2511	45.6927	30.6778	53.1461	31.0019	4.53686	0.324062	73.0219	106.94	436.403	493.654	22327.8	20189	298.328	5.2191	8.19	1.57	0.136
pa8_T	8-10	11.7489	55.2691	28.139	49.5516	30.157	4.59641	0.336323	74.3274	105.381	418.161	451.794	21334.1	26905.8	306.405	5.17098	8.17	1.52	0.136
pa20_T	20-25	12.9111	49.6009	30.761	50.6652	32.3576	6.1735	0.319319	76.2108	103.246	482.171	463.012	21915.9	24566.3	329.604	4.05414	8.18	1.26	0.082
pa40_T	40-45	13.2468	49.8731	29.6756	52.2426	15.9097	7.1086	0.338505	76.9535	69.9577	511.142	429.901	22341.3	25308.9	116.569	2.71608	8.13	1.14	0.073
pa55_T	55-60	13.1032	60.3388	35.922	62.512	14.4455	6.64749	0.383509	83.605	84.372	525.407	460.211	24851.4	30936.4	95.8115	3.1009	7.95	1.15	0.069
pa75_T	75-80	16.5867	66.6855	33.9633	67.2496	17.4894	2.14386	0.45134	83.385	84.6262	559.661	450.212	25500.7	31853.3	235.622	2.81549	8.18	1	0.052
pa100_T	100-105	39.9885	57.668	35.2671	67.7771	13.2108	8.96037	0.34463	92.7053	76.9673	547.961	423.894	27673.8	28971.9	40.3634	3.07697	7.98	1.11	0.052
pa125_T	125-130	44.7035	47.3004	33.9185	62.2723	13.3819	4.37231	0.397483	76.8466	70.2219	508.778	412.057	24259.7	21238.8	51.9831	2.89303	9.35	0.481	0.033
pa145_T	145-150	12.7395	65.584	35.228	71.7052	13.7414	7.24547	0.374766	97.9388	78.7008	648.345	457.214	28707.1	32104.9	49.0378	2.37637	3.68	0.234	0.022
SQG		0.3 mg/kg*	50 mg/kg*		30 mg/kg**	30 mg/kg*	12 mg/kg*	0.3 mg/kg*							800 ng/g**	8 ng/g*
ERL		0.15 mg/kg	80 mg/kg	70 mg/kg	30 mg/kg	35 mg/kg	33 mg/kg	5 mg/kg		120 mg/kg					3500 ng/g	50 ng/g
ERM		1.3 mg/kg	145 mg/kg	390 mg/kg	50 mg/kg	110 mg/kg	85 mg/kg	9 mg/kg		270 mg/kg					23 580 ng/g	400 ng/g
* SQA: D. L.vo n. 172 of 13/10/2015
** SQA: DM 367/2003
