# Supplementary material for: Anthropogenically induced environmental changes in the northeastern Adriatic Sea in the last 400 years (Panzano Bay, Gulf of Trieste)
Source: Copernicus journal article supplement (doi:10.5194/bg-2016-273), 2016-07-22
Supplement: Supplementary file 3 [file Table 3.xls]

## Sheet: correlation matrix
Pearson's correlation coefficient is shown in the lower triangle, while corresponding P-values are reported in the upper one
	clay	C	TOC	N.tot	PAH	PCB	P	Fe	Al	Hg	Cr	Cu	Cd	Ni	Mn	As	Pb	Zn	NMDS axis 1	species richness
clay		0.020902	0.055237	0.27373	0.08838	0.28743	0.88772	0.047049	0.65564	0.64157	0.43969	0.20379	0.97903	0.062179	0.11519	0.49199	0.18705	0.31326	0.4867	0.48002
C	-0.71197		0.11821	0.30356	0.39072	0.32691	0.56171	0.061516	0.094617	0.39419	0.077961	0.35319	0.89064	0.1395	0.034402	0.29212	0.49693	0.71569	0.48037	0.56856
TOC	-0.62122	0.52618		0.00024387	0.013246	0.0046954	0.12799	0.013738	0.25243	0.17883	0.21421	0.033376	0.064463	0.011008	0.0018271	0.56085	0.015227	0.015339	0.0016511	0.11589
N.tot	-0.38367	0.3623	0.91122		0.0064016	0.00012559	0.05402	0.0052843	0.11294	0.094731	0.13656	0.0062287	0.024693	0.0042739	0.0002894	0.35931	0.0027002	0.002861	4.8521e-06	0.020415
PAH	-0.56558	0.30547	0.74589	0.79126		0.0042491	0.033881	0.011119	0.27795	0.055824	0.3614	0.013967	0.24457	0.015867	0.01918	0.088708	3.6953e-05	0.00032774	0.0075535	0.24368
PCB	-0.37371	0.34633	0.80786	0.92512	0.8129		0.054553	0.017652	0.085558	0.24517	0.11701	0.019323	0.067628	0.012367	0.0010882	0.34642	0.00034365	0.00026328	2.0422e-05	0.049387
P	-0.051463	-0.20929	0.51465	0.62364	0.67041	0.62257		0.35502	0.69542	0.0063307	0.84786	0.41107	0.24908	0.33677	0.32508	0.44418	0.029526	0.005191	0.034743	0.083629
Fe	0.63825	-0.60926	-0.74335	-0.8017	-0.75772	-0.72509	-0.32788		0.027337	0.21891	0.020422	0.00081495	0.12185	4.3478e-06	0.00029546	0.2257	0.0096774	0.061807	0.033868	0.31254
Al	0.16158	-0.55671	-0.39972	-0.53264	-0.38057	-0.56972	-0.14207	0.68966		0.82369	7.3827e-06	0.075201	0.10154	0.032792	0.017232	0.4981	0.12014	0.34095	0.13971	0.22831
Hg	0.16856	0.30335	-0.46204	-0.55656	-0.62006	-0.40537	-0.79188	0.4266	-0.081133		0.81897	0.15888	0.31763	0.19108	0.46429	0.54854	0.092283	0.065675	0.14828	0.16752
Cr	0.27629	-0.58133	-0.43054	-0.50498	-0.3238	-0.52764	-0.06989	0.71381	0.96356	-0.083333		0.069041	0.075902	0.014717	0.019741	0.89306	0.14771	0.43332	0.20107	0.27579
Cu	0.43948	-0.32906	-0.6718	-0.79278	-0.74219	-0.71815	-0.29315	0.87875	0.58573	0.48144	0.59594		0.069066	0.0002089	0.0066281	0.38735	0.0083189	0.069799	0.022001	0.099953
Cd	-0.0095853	-0.05012	-0.60392	-0.69833	-0.40584	-0.59837	-0.40232	0.52182	0.54729	0.35261	0.58461	0.5959		0.047045	0.055418	0.4941	0.069161	0.11187	0.020181	0.00046274
Ni	0.60804	-0.50175	-0.75838	-0.81261	-0.73303	-0.75061	-0.33977	0.96812	0.67342	0.45075	0.73848	0.91468	0.63826		0.00079745	0.55088	0.0055927	0.051925	0.025186	0.17176
Mn	0.52987	-0.66899	-0.85029	-0.90723	-0.71873	-0.86927	-0.34757	0.90673	0.72691	0.26219	0.71648	0.7893	0.62086	0.87943		0.27914	0.0092079	0.025937	0.0021973	0.14277
As	0.24671	-0.37036	-0.20974	-0.32513	-0.5651	-0.33345	-0.27368	0.42097	0.24335	0.21621	0.049006	0.30754	-0.24554	0.21497	0.37971		0.29794	0.29271	0.405	0.71818
Pb	-0.45442	0.24399	0.73602	0.83408	0.94519	0.90303	0.6829	-0.76667	-0.52386	-0.55999	-0.49295	-0.77602	-0.59574	-0.79867	-0.76979	-0.36624		4.1561e-05	0.0017342	0.081457
Zn	-0.35559	0.13226	0.73549	0.83152	0.9042	0.90946	0.80264	-0.60873	-0.33702	-0.60178	-0.27999	-0.59465	-0.53398	-0.62789	-0.69418	-0.36994	0.94352		0.00061739	0.075671
NMDS axis 1	0.24964	-0.25315	-0.85421	-0.96723	-0.78177	-0.95285	-0.66806	0.67044	0.50153	0.49235	0.44186	0.70785	0.71475	0.69667	0.84285	0.29679	-0.85232	-0.88717		0.0078649
species richness	0.25335	-0.20572	0.529	0.71384	0.40653	0.6332	0.57261	-0.35609	-0.41884	-0.47286	-0.38216	-0.54942	-0.89529	-0.46876	-0.49821	0.13106	0.5759	0.58498	-0.77938
