# Supplementary material for: Anthropogenically induced environmental changes in the northeastern Adriatic Sea in the last 400 years (Panzano Bay, Gulf of Trieste)
Source: Copernicus journal article supplement (doi:10.5194/bg-2016-273), 2016-07-22
Supplement: Supplementary file 4 [file Table 4.xls]

## Sheet: Sheet1
F-statistic and P-values for the RDA analysis. 10000 permutations were used
	One variable				N.tot + …
Variable	Variance explained	F	Pr(>F)	Variable	Variance explained	F	Pr(>F)
N.tot	0.423856	5.88542	0.0012	clay	0.178577	1.5218	0.1026
PCB	0.409709	5.55263	0.0012	Ni	0.177151	1.50703	0.1041
Zn	0.339125	4.10516	0.007	Fe	0.176647	1.50182	0.0954
Mn	0.338879	4.10065	0.0021	Cd	0.168789	1.42145	0.1392
Pb	0.327656	3.89868	0.0107	Pb	0.155183	1.28582	0.2168
Cd	0.324036	3.83495	0.0028	PAH	0.154607	1.28018	0.2348
TOC	0.323474	3.82513	0.0078	Cu	0.131723	1.06195	0.406
Cu	0.266246	2.90283	0.0363	TOC	0.124798	0.998156	0.472
Ni	0.248369	2.64352	0.0465	Zn	0.124049	0.991313	0.4732
Fe	0.224946	2.32186	0.0569	PCB	0.119653	0.951406	0.5433
PAH	0.224775	2.31959	0.0632	Hg	0.113574	0.896882	0.5873
P	0.185049	1.81654	0.1211	C	0.112904	0.890918	0.5377
Hg	0.167704	1.61197	0.128	As	0.103374	0.807048	0.6673
Al	0.157085	1.49088	0.1688	Mn	0.0835038	0.637784	0.8229
Cr	0.128122	1.1756	0.2688	P	0.0719434	0.542644	0.9242
C	0.0817652	0.712368	0.6536	Al	0.0554676	0.411074	0.9774
clay	0.0806376	0.701683	0.6489	Cr	0.051604	0.380883	0.9808
As	0.0767315	0.664868	0.6889
