# Supplementary material for: Anthropogenically induced environmental changes in the northeastern Adriatic Sea in the last 400 years (Panzano Bay, Gulf of Trieste)
Source: Copernicus journal article supplement (doi:10.5194/bg-2016-273), 2016-07-22
Supplement: Supplementary file [file bg-2016-273-AC3-supplement.pdf]

1 **Anthropogenically induced environmental changes in the northeastern Adriatic Sea in the last**  
2 **500 years (Panzano Bay, Gulf of Trieste)**

3 Jelena Vidović<sup>a\*</sup>, Rafał Nawrot<sup>a</sup>, Ivo Gallmetzer<sup>a</sup>, Alexandra Haselmair<sup>a</sup>, Adam Tomašových<sup>b</sup>,  
4 Michael Stachowitsch<sup>c</sup>, Vlasta Čosović<sup>d</sup> and Martin Zuschin<sup>a</sup>

5

6 <sup>a</sup>Department of Palaeontology, University of Vienna, Althanstrasse 14, 1090 Vienna, Austria

7 <sup>b</sup>Earth Science Institute, Slovak Academy of Sciences, Dúbravská cesta 9, 84005 Bratislava, Slovak  
8 Republic

9 <sup>c</sup>Department of Limnology and Bio-Oceanography, Center of Ecology, University of Vienna,  
10 Althanstrasse 14, 1090 Vienna, Austria

11 <sup>d</sup>Department of Geology, Faculty of Science, University of Zagreb, Horvatovac 102a, 10 000  
12 Zagreb, Croatia

13 \*Corresponding author: [vidovic.jelena@gmail.com](mailto:vidovic.jelena@gmail.com)

14

15 **Abstract**

16 Shallow and sheltered marine embayments in urbanized areas are prone to the accumulation of  
17 pollutants, but little is known about the historical baselines of such marine ecosystems. Here we  
18 study foraminiferal assemblages, geochemical proxies and sedimentological data from 1.6m long  
19 sediment cores to uncover ~500 years of anthropogenic pressure from mining, port and industrial  
20 zones in the Gulf of Trieste, Italy. From 1600 to 1900 AD, concentrations of trace element, nutrients  
21 and pollutants remain relatively constant and foraminiferal assemblages show moderate fluctuations  
22 in abundance of species adapted to high sediment and nutrient supply. The only significant  
23 anthropogenic activity during this period is mercury mining in the hinterlands of the gulf, releasing  
24 high amounts of mercury into the bay and significantly exceeding the standards on the effects of  
25 trace elements to benthic organisms. Nonetheless, the fluctuations in the concentrations of mercury  
26 do not correlate with changes in the composition and diversity of foraminiferal assemblages,  
27 possibly due to its nonbioavailability. A major change in the composition of foraminiferal  
28 assemblages occurs at the onset of 20<sup>th</sup> century and correlates with an overall increase in organic  
29 pollutants and nutrient concentrations. First, intensified agricultural and maricultural activities in

30 the first half of the 20<sup>th</sup> century are associated with an increase in nutrients and correlate with a  
31 minor increase in foraminiferal diversity. Second, intensified port and industrial activities in the  
32 second half of 20<sup>th</sup> century increased the normalized trace element concentrations and persistent  
33 organic pollutants (PAH, PCB) in the topmost part of the core. This increase caused only minor  
34 changes in the foraminiferal community probably because foraminifera in Panzano Bay were  
35 exposed to elevated trace element concentrations for a long time. Our study underlines the  
36 importance of using an integrated, multidisciplinary approach in reconstructing the history of  
37 environmental and anthropogenic changes in marine systems. Given the prolonged human impacts  
38 in coastal areas like the Gulf of Trieste, such long term baseline data are crucial for interpreting the  
39 present state of marine ecosystems.

40

#### 41 **Keywords**

42 Marine pollution, Trace elements, Nutrients, Persistent organic pollutants, Benthic foraminifera

43

#### 44 **1. Introduction**

45 The northern Adriatic Sea is densely urbanized and polluted (Lotze et al., 2006; Cozzi and Giani,  
46 2011), and the areas around the Po River, the Venice Lagoon and in the Gulf of Trieste bear the  
47 highest pressure (Solis-Weiss et al., 2007; Raccanelli et al., 2009). Panzano Bay, located in the  
48 northeastern part of the Gulf of Trieste, is a shallow and sheltered embayment prone to the  
49 accumulation of pollutants, with recent anthropogenic pressure coming from agricultural,  
50 maricultural, mining and industrial activities (Horvat et al., 1999).

51 The impact here started nearly 500 years ago with the onset of mercury mining in the hinterland of  
52 the bay (Singh and Turner 2009, Covelli et al., 2012), enhanced in the late 20<sup>th</sup> century with  
53 intensifying agriculture and mariculture (Aleffi et al., 2006; Rampazzo et al., 2013; Finch et al.,  
54 2014), and continued to the present times with increasing port and industrial activities

55 (thermoelectric plant) of the City of Monfalcone (Notar et al., 2001; Pozo et al., 2009).

56 Such intensive anthropogenic pressures have prompted a growing scientific effort to estimate the  
57 effects of pollution on ecosystem composition here. Most attempts have addressed modifications of  
58 the marine habitats that occurred in the 20<sup>th</sup> century, using only geochemical (Horvat et al., 1999,  
59 Faganeli et al., 2003; Acquavita et al., 2012) or biological proxies (Solis-Weiss et al., 2007). There  
60 is however, a growing tendency towards integrated assessments of its present state (Cibic et al.,  
61 2007; Melis and Covelli, 2013, Franzo et al., 2015), but until today there are no multidisciplinary  
62 studies assessing the long term history of the environmental changes in the northeastern Adriatic  
63 and thus capturing its preindustrial, undisturbed state.

64 Such a historical record requires an integrated geochemical and paleoecological approach. Benthic  
65 foraminifera, among the most abundant microorganisms in shallow and marginal marine  
66 environments, are often used in paleoecological studies. This is because they are highly sensitive to  
67 short term environmental changes (Schönfeld, 2012), they have a high preservation potential and  
68 thus provide an excellent temporal record of ecosystem states over the past hundreds to thousands  
69 of years (Yasuhara et al., 2012).

70 The present multidisciplinary study is designed to provide a high resolution historical record of  
71 environmental changes in Panzano Bay, to obtain information on the state of the ecosystem prior to  
72 the onset of the most intensive impact, and to evaluate the effects of anthropogenic activities in the  
73 bay. We obtained geochemical data and foraminiferal assemblages from a 1.6m long sediment core  
74 containing a centennial scale record of environmental and anthropogenic changes. The core covers  
75 approximately the last **500** years, as indicated by radiocarbon calibrated AAR dating of the mollusks  
76 shells.

77 Taking into account the history of potential anthropogenic stressors in Panzano Bay, we assess the  
78 following hypotheses: (1) agricultural and maricultural activities produce upcore increases in the  
79 concentrations of organic matter, nutrients and trace elements, (2) mining activities and

80 thermoelectric plants generate a progressive enrichment of mercury and persistent organic  
81 pollutants, (3) increased pollutants alter the taxonomic composition of foraminiferal assemblages  
82 and cause a decline of species abundance and diversity.

83 To test these hypotheses, we evaluate the pollution in the bay using geochemical proxies (major,  
84 minor and trace elements, nutrients, persistent organic pollutants) and quantify the composition and  
85 diversity of foraminiferal assemblages. Finally, we reconstruct the chronology of environmental  
86 changes in Panzano Bay over the last **500** years and underline the applicability of our results to  
87 disturbed shallow coastal ecosystems elsewhere.

## 88 **2. Study area**

89 The Gulf of Trieste is a shallow marine basin in the northernmost part of the Adriatic Sea,  
90 occupying an area of about 500km<sup>2</sup>, with an average water depth of 17m and a maximum of about  
91 25m (Fig. 1). Seasonal variations of water temperature range between 8 to 24°C at the surface and 8  
92 to 20°C in the bottom layer. The salinity of the water in the gulf is typically marine, ranging  
93 between 33 and 38.5‰ (Ogorelec et al., 1991).

94 The water enters the gulf in the southeast and continues to the northwest, following the general  
95 anticlockwise circulation pattern of the Adriatic Sea. However, the water circulation in the gulf is  
96 mostly controlled by tides (range ~0.5m), winds (strong northeastern Bora) and seasonal variations  
97 of freshwater inflow. The Isonzo/Soča and Timavo rivers are the most significant sources of  
98 freshwater to the Gulf, with average inflows of about 100-130m<sup>3</sup>/s each (Ogorelec et al., 1991).

99 The Gulf of Trieste generally shows mesotrophic to oligotrophic conditions, with episodic  
100 eutrophication events, accompanied by summer thermal stratification of the water column  
101 (Ogorelec et al., 1991; Horvat et al., 1999; Turk et al., 2007).

102 The main sediment supply comes from the Isonzo River in the north and from the weathering of the  
103 Paleogene flysch deposits outcropping along the southern coast of the gulf. The sediment  
104 accumulation rates are approximately 1 mm/yr in the central part of the gulf and increase to about

105 2.5mm/yr towards the mouth of the Isonzo River located in Panzano Bay (Ogorelec et al., 1991, our  
106 unpublished data). Surface sediments in this area are mostly silt clays and clay silts (Zuschin and  
107 Piller, 1994) occupied by a high biomass epifauna (Zuschin et al., 1999).

108 The Gulf of Trieste is affected by many sources of organic and inorganic pollutants, coming from  
109 agricultural and industrial activities in the hinterland as well as from tourist and maricultural  
110 activities along its coasts (Notar et al., 2001; Covelli et al., 2006). Panzano Bay is one of the highly  
111 impacted areas, with organic pollution coming from mussel farms located along the eastern part of  
112 the Gulf of Trieste (Melaku Canu and Solidoro, 2014) and industrial and port areas of the city of  
113 Monfalcone, including a thermoelectric plant and several coal, petroleum and other cargo handling  
114 piers (Fig. 1). The Monfalcone thermoelectric plant consists of four thermoelectric generator sets  
115 powered by coal and fuel oil and became operative in 1965 ("The Monfalcone Thermoelectric  
116 Plant"). Finally, there is substantial Hg pollution originating from the Idrija mercury mine in the  
117 hinterlands and delivered to the bay through the Isonzo river flow (Horvat et al., 1999; Notar et al.,  
118 2001). Idrija, situated 50km west of Ljubljana (Slovenia), was the second largest Hg mine in the  
119 world, operating for nearly 500 years until its definite closure in 1995 (Faganeli et al., 2003; Covelli  
120 et al., 2012). During this period, over 5 million tones of Hg ore were mined and much of the  
121 residues were spread around the town and its vicinity (Miklavčič, 1999). Most of the Isonzo riverine  
122 input of Hg is in particulate form (1500kg/yr), followed by dissolved Hg at 8.6kg/yr (Faganeli et al.,  
123 2003). Dissolved mercury is biogeochemically reactive and tends to accumulate in certain seafood  
124 from mariculture, presenting social and economic problems for the local population (Faganeli et al.,  
125 2003).

### 126 **3. Methods**

#### 127 **3.1. Sampling**

128 Three sediment cores, two for sedimentological and one for foraminiferal analyses, 1.6m long with  
129 a diameter of 9cm, were acquired using an UWITEC piston corer with hammer action (Gallmetzer

130 et al., 2006) from a research vessel in summer 2013. The drilling station is located in the central  
131 part of Panzano Bay (45°44,122' N; 13°36,029' E) at a water depth of 12.5m. The uppermost 20cm  
132 of each core were sliced into 2cm thick intervals in order to attain high resolution data. The rest of  
133 the core was sliced into 5cm thick samples. For analytical purposes and in order to improve  
134 compatibility with the lower part of the core, the uppermost 2cm thick samples were merged into  
135 4cm thick intervals (reducing the number of samples from 36 to 31). Sediment samples were used  
136 to determine grain size, the content of major, minor and trace elements, nutrients and persistent  
137 organic pollutants. Core chronology is based on molluscan shells dated by <sup>14</sup>C calibrated amino acid  
138 racemisation.

### 139 **3.2. Sediment parameters**

140 The grain size of 36 samples was analyzed using a sedigraph (SediGraph III 5120 Particle Size  
141 Analyzer) for the small fractions (<63µm) and dry sieving for fractions from <63µm to >1mm. The  
142 sediments were classified according to the Shepard's classification (1954).

143 The concentrations of elements, nutrients and pollutants were determined at specific core sections:  
144 1cm, 5cm, 9cm, 24cm, 46cm, 69cm, 85cm, 105cm, 126cm and 151cm core depth. Geochemical  
145 analyses included the content of major (Fe, Al), minor (Mn, P) and trace elements (As, Cd, Cr, Cu,  
146 Hg, Ni, Pb, Zn), nutrients (total organic carbon – TOC and total nitrogen – TN), persistent organic  
147 pollutants (polycyclic aromatic hydrocarbons – PAH, polychlorinated biphenyls – PCB) and total  
148 inorganic carbon (C).

149 To analyze elemental concentrations, each sediment sample was gently squeezed to break down  
150 aggregates and screened through a PE sieve to remove particles bigger than 1mm. A part of the  
151 screened sediment was dried in an oven at 105°C until reaching a constant weight (to measure water  
152 content). The dried sediment was ground to powder using an agate mortar and pestle before further  
153 analyzing the contents of heavy metals and As. The sample (about 0.4g d.w.) was digested with 8ml  
154 HNO<sub>3</sub> in a microwave oven (Multiwave 3000, Anton Paar, Austria). The digested material was left

155 to cool at room temperature and then filtered through a 0.45µm nitrocellulose membrane filter. The  
156 filtered digestates were diluted with distilled deionized water to 40ml in a volumetric flask  
157 (USEPA, 1994A). The concentrations of the elements (Al, As, Cd, Cr, Cu, Fe, Mn, Ni, Pb, Zn)  
158 were determined by inductively coupled plasma atomic emission spectrometry (ICP-AES) (Optima  
159 2100DV, Perkin Elmer, USA) (USEPA, 1994B). Mercury analyses were carried out using atomic  
160 absorption spectrophotometry with cold vapor (Analyst 100, Perkin Elmer, USA) (USEPA, 1976).  
161 The quality acceptance protocols required that one blank sample or one certified reference material  
162 (BCR-277r estuarine sediment, Community Bureau of Reference) were digested and analyzed with  
163 each batch of fifteen samples. The blank results indicated that the analytical procedure was free  
164 from contamination because the concentrations of all metals were below the respective method  
165 detection limits. Mean recovery from the certified material ranged between 84% (Zn) and 103%  
166 (Hg), except for Al (40%) because the extraction method was not strong enough to break crystalline  
167 aluminosilicates. The analytical precision, determined using five replicates of homogenized  
168 samples, was estimated to be better than 10% for all elements. Calibration for ICP-AES and AAS  
169 analysis was achieved with prepared external standards via the standard curve approach. Full  
170 calibration was performed after every set of 48 samples. The method detection limit for element  
171 analysis was defined as 3 times the standard deviation of 10 blank measurements.

172 Carbon and nitrogen determination was performed following the method of Hedges and Stern  
173 (1984), using an elemental analyzer (CHN 2400, Perkin Elmer, USA). The total concentration (TC  
174 and TN) was determined on an aliquot of the sample as is (about 10mg of dry sediment); the  
175 organic fraction of carbon (TOC) was determined after treatment of another aliquot of the sample  
176 with acid vapors. The inorganic fraction (C) was calculated by the difference between the total and  
177 organic concentrations. For the instrument calibration, before each daily series of analyzes, three  
178 replicates of Acetanilide standard were performed. For the quality acceptance protocols one blank  
179 sample every five samples was analyzed.

180 To analyze the concentrations of persistent organic pollutants, sediment samples were thoroughly  
181 mixed, sieved through a 1mm mesh to remove any debris, and subsequently air dried in the dark at  
182 room temperature for 48h on hexane rinsed aluminum foil. The dry samples were finely ground in  
183 an agate mortar. The extraction was performed using a Microwave Sample Preparation System  
184 (Multiwave 3000, Anton Paar Graz, Austria), in accordance with the EPA recommendation (method  
185 3546). Two grams of dried sediments were weighed into lined microwave extraction vessels. Then,  
186 a 25ml 1:1 acetone/hexane solvent mixture was added. The vessels were then assembled as  
187 instructed by the manufacturer and the extraction was conducted during 15 min at 110°C and 6-10  
188 bars. At the end of the oven program, vessels were cooled to room temperature and the extracts  
189 were filtered and rinsed with the same solvent mixture.

190 The samples were concentrated in a rotating evaporator (Rotavapor-R Buchi, CH), and the sulphur  
191 compounds were removed by soaking the extracts with activated copper powder. Purification and  
192 fractionation were performed by eluting extracts through chromatography glass columns packed  
193 with Silica gel/Alumina/Florisil (4+4+1gr). The first fraction, containing PCBs, was eluted with  
194 25ml of n-hexane, whereas the second fraction, containing the PAHs, was eluted with 30ml of 8:2  
195 n-hexane/methylene chloride solvent mixture (Fossato et al., 1996, 1998). After concentration with  
196 a rotary evaporator, the samples were ready for the instrumental analysis.

197 The identification of PAHs and PCBs was based on matching retention time, and the quantification  
198 was obtained from calibration curves established for each compound by analyzing four external  
199 standards. Average determination coefficients  $R^2$  of the calibration curves exceeded 0.99 for both  
200 PAH and PCB, and the relative standard deviations of the calibration factors were always less than  
201 20% (average 10%). The detection limits were 0.05-0.1ng/g and 0.05ng/g for PAHs and PCBs,  
202 respectively. Blanks were run for the entire procedure. Recovery and accuracy were validated with  
203 IAEA-417 and IAEA-159 sediment sample certified reference materials. Laboratory methods were  
204 also validated by intercalibration activities (IAEA, 2001, 2007, 2012).



205 Raw concentrations of Hg, Cr, Pb, As, Cd and PCB were compared to Italian sediment quality  
206 guidelines (SQG), following the directive D. L.vo n. 172 of 13/10/2015, whereas PAH and Ni  
207 threshold concentrations were taken from directive DM 367/2003. Additionally, raw concentrations  
208 were compared to two sediment quality criteria used around the world: effects range low (ERL),  
209 representing the threshold level below which effects to benthic organisms rarely occur, and effects  
210 range medium (ERM), above which effects are likely to occur (Burton, 2002). Finally, trace  
211 elements were **normalized** to a reference element (Al) in order to compensate for grain size and  
212 mineralogical effects on the metal variability in samples (Covelli et al., 2006).

### 213 **3.3. Foraminiferal analyses**

214 A total of 36 sediment samples were washed with water through a set of sieves with 63, 125, 250  
215 and 500 $\mu$ m meshes. Each obtained subsample was split with a microsplitter in order to yield around  
216 300 specimens. Individuals were identified under a binocular microscope following the  
217 classification of Loeblich and Tappan (1987) and Cimerman and Langer (1991). Foraminiferal  
218 species were categorized into different ecological categories: according to their substrate relation  
219 (infaunal, epifaunal, epiphytic, and epifaunal/infaunal groups, and an epiphytic/infaunal group for  
220 ambiguous literature data) and according to their tolerance to different types of pollution, namely  
221 organic or chemical (referring to trace elements and persistent organic pollutants), hereafter referred  
222 to as stress tolerant taxa. This classification was based on a total of 84 sources, including studies  
223 carried out in the Adriatic (Jorissen, 1987, 1988; Van der Zwaan & Jorissen, 1991; Jorissen et al.,  
224 1992; Barmawidjaja et al., 1992, 1995; Hohenegger et al., 1993; Vaniček et al., 2000; Donnici and  
225 Serandrei Barbero, 2002; Albani et al., 2007,; Frontalini and Coccioni, 2008, 2011; Di Bella et al.,  
226 2008, 2013; Vidović et al., 2009, 2014; Coccioni et al., 2009; Popadić et al., 2013; Melis and  
227 Covelli, 2013; Langlet et al., 2013, 2014). Additionally we used important primary and secondary  
228 literature about foraminiferal ecology (Murray, 1991, 2006; Langer, 1993), the most recent studies  
229 about improved tools and methods when using benthic foraminifera in environmental monitoring

230 (Barras et al., 2014; Alve et al., 2016; Dimiza et al., 2016) and Paleobiology Database  
231 (Behrensmeyer and Turner, 2013). A full list of used sources is given in the Supplement: Table S1.

### 232 **3.4. Statistical analyses**

233 Before further statistical treatment, 18 environmental variables (grain size and raw concentrations  
234 of nutrients and organic and inorganic pollutants) were checked for normality, log transformed  
235 when non normal distribution was detected, and z standardized to account for different units and  
236 scales. Pearson correlations among environmental variables and principal component analysis  
237 (PCA) based on these 18 variables were performed to assess their collinearity and stratigraphic  
238 distribution. Only clay content was used in the multivariate analyses because other grain size  
239 fractions correlate with the percentage of clay.

240 The total foraminiferal assemblages were used in all analyses by pooling all mesh size fractions for  
241 each sample. Species diversity was measured using species richness, the exponential of Shannon  
242 entropy, and Fisher's  $\alpha$ . The exponent of the Shannon index (H) corresponds to the number of  
243 equally abundant species that would produce the given value of H (Hill, 1973; Jost, 2006). As all  
244 three diversity measures strongly depend on the number of sampled individuals, we rarefied our  
245 abundance data down to the size of the smallest sample (240 specimens). This procedure was  
246 repeated 1000 times and the mean values of species richness,  $\exp(H)$  and  $\alpha$  with corresponding 95%  
247 confidence intervals were computed across all iterations.

248 Species relative abundance data were square root transformed before multivariate analyses. Non  
249 metric multidimensional scaling (NMDS) based on Bray-Curtis distances was used to visualize  
250 gradients in community composition. Rescaling the NMDS space according to the underlying  
251 dissimilarity matrix and rotating it with the principal component analysis maximized the  
252 compositional variation among samples along the first ordination axis (Oksanen et al., 2015).  
253 NMDS axis 1 scores thus correspond to the relative position of samples along the main gradient in  
254 species composition. The Pearson correlation was used to measure the association between the

255 environmental variables and NMDS axis 1 scores for the subset of samples with available values of  
256 elemental concentrations.

257 Redundancy analysis (RDA) combined with the forward model selection approach was employed to  
258 quantify variation in the multivariate composition of foraminiferal assemblages explained by  
259 environmental variables. The effects of environmental variables were first tested in single  
260 regressions. Most environmental variables, however, show some degree of collinearity, and the  
261 forward model selection approach was thus employed to find a subset of factors that maximizes the  
262 explanatory power of environmental variables. At each step of the model building algorithm, an  
263 environmental variable with the highest partial  $R^2$  was added while considering the effects of the  
264 already selected variables, and the significance of the additional contribution was evaluated through  
265 a permutation test (10 000 permutations) (Blanchet et al., 2008).

266 To identify the timing of the major shifts in assemblage composition, we performed chronological  
267 clustering, a type of constrained cluster analysis that takes into account the temporal sequence of  
268 samples (Birks, 2012), by using the CONISS algorithm (constrained incremental sum of squares  
269 agglomerative clustering) implemented in “chclust” function from the “rioja” package (Juggins,  
270 2015). The number of significantly distinct temporal bins was determined by comparing the amount  
271 of variance accounted for by a given number of clusters to a random expectation based on the  
272 broken stick model (Bennett, 1996). Clustering was performed on the Bray-Curtis distance matrix  
273 based on relative abundance data. All statistical analyses were performed in R 3.2.1 (R Core Team,  
274 2014) using “vegan” (Oksanen et al., 2015) and “rioja” (Juggins, 2015) packages.

### 275 **3.5. Chronological framework**

276 Core chronology is based on the radiocarbon calibrated amino acid racemization dating of the  
277 bivalve species *Varicorbula gibba*. First, 13 shells of *V. gibba* were selected for  $^{14}\text{C}$  dating and  
278 analyzed at the Poznan Radiocarbon Laboratory. Radiocarbon ages were converted to calendar  
279 years using Calib7.1 (Stuiver and Reimer, 1993), the Marine13 data (Reimer et al., 2013), and a

280 regional marine reservoir correction ( $\Delta R$ ) in the northeastern Adriatic equal to  $-61$  years (standard  
281 deviation = 50 years) (Siani et al., 2000). The extent of amino acid racemization (AAR) in 329  
282 shells was analyzed at Northern Arizona University using reverse phase high pressure liquid  
283 chromatography (RP-HPLC) and the procedures of Kaufman and Manley (1998). Thirty specimens  
284 of *V. gibba* were randomly selected from eleven, more or less evenly spaced, 4cm or 5cm thick  
285 intervals covering the whole core thickness. The rate of AAR was calibrated based on the 13 shells  
286 dated with  $^{14}\text{C}$  and three live collected individuals with the Bayesian model fitting according to  
287 Allen et al. (2013). The time dependent reaction kinetic model with the initial D/L value estimated  
288 from data and lognormal uncertainty showed the best calibration between D/L values of aspartic  
289 acid and calendar ages. AAR data in 18 shells did not pass screening criteria, and ages of 311  
290 specimens in total were used for core chronology. Median age of *V. gibba* in the lowermost (145-  
291 150 cm) increment is 1616 AD, but interquartile range of ages of *V. gibba* in this increment  
292 includes shells that died in the 16th century. Therefore, we used median ages to set the chronology  
293 of events, but the core effectively captures the past 500 years of environmental history in Panzano  
294 Bay (Fig. 2).

## 295 **4. Results**

### 296 **4.1. Sediment parameters and geochemistry**

297 The grain size distribution is rather homogeneous throughout the Panzano Bay core, with only a  
298 slight increase in the contribution of the  $>1\text{mm}$  fraction in the uppermost part (up to 9%). The  
299 sediment in the lowermost part of the core is composed of silty clay (50-55% clay). Starting from  
300 135cm toward the upper section of the core, the amount of clay decreases to 44-50% and the  
301 sediment changes into clayey silt (Fig. 3).

302 Principal component analysis (PCA) based on raw elemental concentrations illustrates the  
303 correlation between elements, with the first two axes explaining 74.8% of the variance of the data  
304 (Fig. 4). This approach distinguishes two major groups of elements with different vertical

305 distribution trends (Fig. 3, Table S2), and three elements (Hg, As, C) that do not fall into this  
306 grouping and have distinct position in the ordination space. The first group comprises trace (Cr, Cu,  
307 Ni, Cd, Mn) and conservative elements (Fe, Al), characterized by positive mutual correlations  
308 (Table S3), relatively higher concentrations in the lower part of the core and a pronounced decrease  
309 in the upper 35cm. The second group includes organic and inorganic pollutants and nutrients whose  
310 raw concentrations are stable (Pb, Zn, PCB) or increase only slightly (PCB, TN, TOC, P) in the  
311 lower part of the core, but sharply increase in the uppermost 35cm. Concentrations of PAH increase  
312 markedly in the upper 35 cm, although they also show high values at 75cm. Normalization to Al  
313 reveals two pronounced peaks in the concentrations of the elements from the first group: at 125-  
314 130cm core depth and in the uppermost 10cm. The latter peak is also visible in normalized Pb and  
315 Zn values (Fig. 3). The concentration of Hg sharply increases from 12.7mg/kg at 145-150cm of the  
316 core depth, to 44.7mg/kg at 100-130cm. The Hg values then decrease upcore to a minimum in the  
317 surface sediment (8.2mg/kg). Concentrations of As vary in the lower core (2.1-9mg/kg) but  
318 gradually decrease to 4.3mg/kg in the surface sediment (0-20cm). Normalization to Al reveals one  
319 concentration peak of As in the upper 10cm; it coincides with the peak of all other trace elements.  
320 Total carbon remains constant throughout the core (8-9.35%), except for the lowermost part (3.7%  
321 C).

#### 322 4.2. Trends in foraminiferal assemblages

323 A total of 69 benthic foraminiferal species were identified in the sediments from Panzano Bay, with  
324 raw species richness varying between 29 and 41 species in individual samples (26-36 species after  
325 rarefaction to 240 individuals; Table S1). The highest percentage of individuals belongs to the  
326 suborder Rotaliina (63-89%), followed by Miliolina (8-29%) and Textulariina (1.5-11%). Relative  
327 abundances of suborders are generally constant throughout the core and vary notably in the  
328 uppermost 20cm only (Fig. 5). Diversity is high throughout the core and increases only in the  
329 second half of the 20<sup>th</sup> century. Values of Fisher  $\alpha$  index vary from 7.5 in the lower core to 12 in the

330 uppermost sample; the exponential of Shannon index ranges from 14 to 23 and shows the same  
331 vertical trend (Fig. 6A).

332 Epifaunal/infaunal and infaunal taxa dominate the assemblages, having variable abundances in the  
333 lower core (late 17<sup>th</sup> and 18<sup>th</sup> century) and more stable abundances in its upper part (Fig. 6D). In  
334 contrast, the number of infaunal species increases distinctly during the 20<sup>th</sup> century (Fig. 6E).

335 Foraminiferal species tolerant to both chemical and organic pollution dominate the assemblages  
336 (40-60%), with maximum abundances in the 18<sup>th</sup>, 19<sup>th</sup> and the second half of the 20<sup>th</sup> century.  
337 Species known to tolerate only organic pollution make up 19 to 42% of the assemblage and have  
338 opposite temporal trends than the organic/chemical group, with decreasing trends in the above  
339 mentioned time intervals (Fig. 6F, Table S1).

340 NMDS ordination and chronological cluster analysis of the assemblages reveal two main groups of  
341 samples, with the major shift in relative species abundances starting around 35cm (Figs. 6B, 6C and  
342 7). This depth approximately corresponds to the late 19<sup>th</sup> century, ~1860 AD (Fig. 2). *In the NMDS*  
343 *space, samples from the lower and middle part of the core (150-35cm) are associated with positive*  
344 *scores along the first axis and are tightly grouped, indicating relatively homogeneous faunal*  
345 *composition.* These assemblages are characterized by dominance of *Valvulineria* sp., *Nonionella*  
346 sp., non keeled elphidiids, *Ammonia* sp., *A. tepida* and *Haynesina depressula* (Fig. 5). The 130-  
347 135cm sample (latest 17<sup>th</sup> century) represents an outlier with unusually low abundance of *Ammonia*  
348 sp. and an increased share of epiphytic species. *In contrast, the samples from the upper 35cm of the*  
349 *core are associated with negative scores along the first axis and are widely distributed in the*  
350 *ordination space. The separation of the uppermost part of the core from the rest of the core in the*  
351 *ordination space suggests a continuous, but a relatively strong shift in the assemblage composition*  
352 *at the onset of the 20<sup>th</sup> century (Fig. 7).* Here, the major drop in the abundance of *Valvulineria* sp.  
353 and non keeled elphidiids is accompanied by an increasing proportion of *Miliolinella* sp.,  
354 *Triloculina* sp., *Haynesina depressula*, *Haynesina* sp. and *Nonion* sp. (Fig. 5).

355 Within each of the two major groups of samples, further clusters are recognizable, defined by the  
356 breaks at 85 and 20cm (Fig. 6C). The lowermost part of the core (150-85cm) corresponds to the  
357 period from ~1600 to ~1800 AD and has variable foraminiferal distribution trends. The middle part  
358 of the core (85-35 cm, ~1800 to ~1860 AD) is characterized by more stable foraminiferal  
359 abundances and a pronounced decline of the genus *Valvulineria*. At 35-20cm (~1860 to 1950 AD)  
360 the diversity of the foraminiferal assemblages slightly increases, as do the abundances of epiphytic  
361 species. The uppermost sediment (20-0cm, 1950 until today) is characterized by a further increase  
362 in biodiversity and in the abundance of textulariids (Figs. 5 and 6A).

### 363 **4.3. Relationship between foraminiferal assemblages and geochemical proxies**

364 NMDS axis 1 scores are positively correlated with concentrations of Cu, Ni, Cd, Mn, Fe, Al and  
365 negatively with total nitrogen and PCB (Table S3). The amount of clay does not correlate with axis  
366 1 scores (Table S3). Total nitrogen content explains the highest proportion of variation in  
367 assemblage composition (42.4%) and is the only explanatory variable included in the RDA analysis  
368 following the forward model selection procedure (Table 1). However, other elements closely  
369 (positively or negatively) correlate with total nitrogen content and explain a significant amount of  
370 variation in single RDA analyses (Table 1), including TOC, organic pollutants (PAH and PCB), and  
371 trace elements (Mn, Fe, Ni, Cu, Cd, Zn). The assemblages from the topmost sediment layers (20<sup>th</sup>  
372 century) are clearly separated from the middle core assemblages and from assemblages at the base  
373 along RDA axis 1 (Fig. S1). Therefore, this separation reflects the stratigraphic increase in the  
374 content of nitrogen, organic carbon and pollutants and the stratigraphic decline in several trace  
375 elements (Fig. 3).

## 376 **5. Discussion**

### 377 **5.1. The effects of agricultural and maricultural activities**

378 The agricultural use of pesticides and of organic or inorganic fertilizers releases considerable  
379 amounts of pollutants into the environment (Campos, 2003; He et al., 2005; Finch et al., 2014).

380 Pesticides contain pollutant elements such as As, Hg, Cr and Pb (Campos, 2003), while fertilizer  
381 contamination includes the discharge of macronutrients (N, P, K) and trace elements, including Co,  
382 Cu, Fe, Mn and Zn (Finch et al., 2014). Maricultural activities, in turn, disperse organic matter  
383 (waste feed and feces) and nutrients (Mantzavrakos et al., 2007), leading to elevated concentrations  
384 of P, TN and TOC in the sediment (Holby and Hall, 1991; Hall et al, 1990, 1992; Mook et al.,  
385 2012).

386 In the Panzano Bay sediments, trace (Cr, Cu, Ni, Cd, Mn) and conservative elements (Fe, Al) have  
387 relatively higher concentrations in the lower part of the core and a pronounced decrease in the upper  
388 35cm. The only discrepancy of this trend occurred in the latest 17<sup>th</sup> century, when the  
389 concentrations of all these elements declined, with simultaneous change in grain size (Fig. 3).  
390 Although these elements show some fluctuations that are in phase with grain size variations,  
391 absolute changes in sediment grain size are very minor and it is thus difficult to infer changes in  
392 environment based on it. Few elements (Cd, Cr and Pb) sporadically and slightly exceed the limits  
393 imposed by the Italian SQG (Fig. 3, Table S2). Only Ni has elevated values throughout the core,  
394 even when compared to the standards evaluating the effects of trace elements to benthic organisms  
395 (ERL and ERM). Ni, Cd and Cr have a high positive correlation with the major constituents of clay  
396 minerals (Al and Fe), the main scavengers of trace elements (Romano et al., 2013). This points to a  
397 possible grain size and mineralogical effect on the accumulation of these elements throughout the  
398 core because the sediment in Panzano Bay is composed of silt and clay fractions (Fig. 3).

399 In order to account for such natural processes, to identify background levels and to determine  
400 excess trace elements related to anthropogenic contamination, normalized values (trace elements/Al  
401 ratios) are usually applied (Covelli et al., 2006; Romano et al., 2013). Normalized concentrations of  
402 Cr, Cu, Ni, Cd, Zn and Mn in Panzano Bay are low before the 1950s and, together with As and Pb,  
403 increase only in the last 30 years (Fig. 3). Such an increase can reflect the rapid development of  
404 technology and the intensification of agricultural activities during the 20<sup>th</sup> century.



405 Similar vertical trends have been recorded in the Marano Lagoon, located 20km west of Panzano  
406 Bay (Covelli et al., 2013). The Ni concentrations are almost the same in the two areas, while Pb  
407 values are slightly higher in Panzano Bay (starting from 1980 until today). The additional source of  
408 Pb here could come from industrial or port activities (see below).

409 The responses of foraminiferal assemblages to elevated trace element concentrations generally  
410 include declining species abundance and diversity as well as altered taxonomic composition  
411 because more sensitive species die off and more tolerant taxa prevail (Debenay et al., 2000;  
412 Coccioni et al., 2009). Foraminifera can assimilate potentially toxic elements by ingesting  
413 contaminated detritus or algae, but also by incorporating these elements during test crystallization,  
414 leading to test abnormalities (Le Cadre and Debenay, 2006; Frontalini et al., 2009; Martinez-Colón  
415 et al., 2009). In foraminiferal assemblages from Panzano Bay, however, no test abnormalities  
416 occurred, indicating that the threshold of elemental concentrations for such an impact was never  
417 reached during the last 500 years.

## 418 **5.2 Changes in foraminiferal assemblages before the 20<sup>th</sup> century**

419 During the period 1600-1900 AD, foraminiferal assemblages in Panzano Bay are characterized by  
420 stable diversity indices and by a relatively high abundance of stress tolerant genera and species,  
421 including *Valvulineria* sp., *Ammonia* sp., *A. tepida* and non keeled elphidiids (Figs. 5 and 6F).

422 The genus *Ammonia* (and especially *A. tepida*) is usually described as being tolerant to all kinds of  
423 stress conditions, including organic and heavy metal pollution (Jorissen, 1988; Coccioni et al.,  
424 1997; Armynot du Châtelet et al., 2004; Ferraro et al., 2006; Frontalini and Coccioni, 2008). Non  
425 keeled *Elphidium* species prefer an infaunal mode of life (Murray, 2006) and can be associated with  
426 food enrichment of the sediments (Donnici and Serandrei Barbero, 2002; Vidović et al., 2009,  
427 2014). These requirements are similar to those of the infaunal genus *Valvulineria*, which is adapted  
428 to large seasonal variability of organic matter and periodic hypoxic conditions (Jorissen, 1987;  
429 Donnici and Serandrei Barbero, 2002; Piva et al., 2008). *Valvulineria* is considered to be

430 representative of environmental conditions prevailing during the “Little Ice Age” (LIA), that  
431 include enhanced rainfall, increased fluvial runoff and increased turbidity (Piva et al., 2008).  
432 Interestingly, the distinct peak of *Valvulineria* in Panzano Bay in the early 19<sup>th</sup> century (Fig. 5)  
433 coincides with the maximum abundances of this genus in sediments from the central and south  
434 Adriatic. This peak is attributed to one of the coldest and most humid phases of the LIA,  
435 characterized by substantially increased river discharge (Piva et al. 2008). The second peak of  
436 *Valvulineria* in Panzano Bay occurred in the 18<sup>th</sup> century (Fig. 5), thus pointing that humid  
437 conditions prevailed in the bay also during this period. To conclude, high abundances of *Ammonia*,  
438 non keeled *Elphidium* and *Valvulineria* genera during the 17<sup>th</sup> to 19<sup>th</sup> century suggest high river  
439 runoff and high organic matter input in Panzano Bay. In contrast to fluctuations in abundance of  
440 these foraminiferal taxa, vertical changes in the concentration of nutrients in the lower and middle  
441 part of the core are mild. However, the spacing of increments that were analyzed for nutrients is  
442 larger than dense spacing of increments analyzed for the composition of foraminiferal assemblages.  
443 In addition, concentrations of nutrients, grain size distribution and vertical changes in foraminiferal  
444 assemblages are likely further affected by vertical homogenization by bioturbation, as evidenced by  
445 decadal to centennial time averaging of *Varicorbula gibba* (Fig. 2), thus making difficult to detect  
446 the effects of environmental fluctuations occurring at higher (seasonal or yearly) temporal  
447 resolution.

448 The foraminiferal community from Panzano Bay is also highly correlated with several trace  
449 elements (Table S3) that accumulated in fine grained sediments during this period (as discussed  
450 above). Although the assemblages show no effects of elevated trace element concentrations in terms  
451 of decline of species abundance or diversity, they remain dominated by taxa tolerant to both  
452 chemical and organic pollution (Fig. 6F), as observed also in other foraminiferal assemblage in the  
453 northern Adriatic (Jorissen, 1987; Donnici and Serandrei Barbero, 2002). These results imply that  
454 the community in Panzano Bay has a long history of adaptation to elevated trace element

455 concentrations.

### 456 **5.3 Changes in foraminiferal assemblages during the 20<sup>th</sup> century**

457 With the onset of the 20<sup>th</sup> century, the diversity of foraminiferal assemblages slightly increased  
458 (mainly with the increase of infaunal taxa, as reported in Naeher et al., 2012), but this trend  
459 becomes pronounced only from 1950 AD onwards (Figs. 6A and 6E). However, the overall  
460 assemblage composition in the 20<sup>th</sup> century changed markedly, relatively to the pre-20<sup>th</sup> century  
461 assemblage composition. The uppermost parts of the core show a very strong and directional  
462 change in composition lasting up to the present (Fig. 7), whereas the lower and middle parts of the  
463 core were characterized by a relatively constant taxonomic composition, with a much smaller  
464 multivariate dispersion in NMDS (Fig. 7).

465 Nutrient concentrations (TN, TOC and P) increase markedly in the uppermost parts of the core (Fig.  
466 3). Although upward increasing concentrations of TOC and TN can be partly related to their  
467 recycling dynamic, the corresponding increase in pollutants (PAH and PCB) and other observations  
468 of major increase in pollutants and organic enrichments in the Gulf of Trieste (Heath et al., 2006)  
469 imply that the nutrient increase also reflects intensifying agricultural and maricultural activities in  
470 the Gulf of Trieste during the 20<sup>th</sup> century. The increase in diversity observed in the uppermost parts  
471 of the core not only correlates with nutrient enrichment (in accord with observations that early  
472 stages of eutrophication can increase species richness, Martinez-Colón et al., 2009) but also with  
473 higher concentrations of pollutants, thus rather contrasting with the hypothesis that pollution  
474 inevitably decreases species richness.

475 Moreover, total N and P in Panzano Bay sediments are similar to the values measured in sediments  
476 beneath adjacent mussel farms (Rampazzo et al., 2013; Franzo et al., 2014). Mussel farming here  
477 became an important activity by the middle of the 20<sup>th</sup> century, reaching peak production in 1990  
478 (Melaku Canu and Solidoro, 2014). Intense mussel biodeposition enriches surface sediments  
479 underneath the farms in organic matter, causing anoxic conditions (Rampazzo et al., 2013).

480 Nonetheless, the impact of this farming does not significantly alter the overall coastal marine  
481 system (Danovaro et al., 2004; Vidović et al., 2009, 2014). Rather, strong winds disperse and  
482 resuspend surface organic rich sediments over the broader area of the gulf (Franzo et al., 2014).

483 Besides the increase in diversity, the 20<sup>th</sup> century is marked by a taxonomic change in foraminiferal  
484 assemblages: the abundances of *Valvulineria* sp. and non keeled elphidiids decrease, whereas  
485 *Haynesina* sp. and epiphytic genera (*Miliolinella* sp., *Triloculina* sp.) become more abundant (Figs.  
486 5 and 6D). Additionally, in the second part of the 20<sup>th</sup> century herbivorous genus *Ammonia* also  
487 slightly increases its abundances, with only *A. tepida* not following this trend. Relatively higher  
488 abundances of these epiphytic, herbivorous genera during this period suggest the presence of  
489 seagrasses or macroalgal meadows near the sampling station (e.g., Langer, 1993; Mateu-Vicens et  
490 al., 2010). Furthermore, a slight shift in the trophic mode of foraminiferal species in the 20<sup>th</sup> century  
491 (increase of herbivorous taxa) indicates enhanced phytoplankton productivity, probably reflecting  
492 higher nutrient levels. The distribution of the genera *Miliolinella* and *Triloculina* in the Gulf of  
493 Trieste has already been related to their feeding preference for diatoms in addition to organic  
494 detritus and bacteria (Hohenegger et al., 1993).

495 *Haynesina*, another genus commonly found in the sediments in the upper part of the core, is also  
496 herbivorous, known to be tolerant to high concentrations of organic matter (Debenay et al., 2001;  
497 Arminot du Châtelet et al., 2004; Murray, 2006; Romano et al., 2008). Higher abundances of  
498 *Haynesina*, together with the increase in overall foraminiferal diversity, may be related to the 20<sup>th</sup>  
499 century nutrient enrichment (Fig. 3) because the representatives of this genus indirectly benefit by  
500 feeding on enhanced microalgal biomass (Ward et al., 2003). The faunal shift in dominance of  
501 *Valvulineria* to *Haynesina*, together with higher abundance of epiphytic species, suggests milder  
502 seasonal variations of river discharge and enhanced microalgal biomass as a consequence of  
503 nutrient enrichment. These conclusions are supported by the RDA analysis, pointing to organic  
504 enrichment as a key factor controlling the composition of foraminiferal communities in Panzano

505 Bay (Fig. S1, Table 1).

506 Finally, the increase in abundance of the suborder Textulariina in this uppermost part of the core  
507 may be the result of taphonomic processes: agglutinated taxa are susceptible to postdepositional  
508 degradation, and the destruction of their tests explains the downcore reduction of their relative  
509 abundances (Diz and Francés, 2009).

#### 510 **5.4. Idrija mercury mine**

511 The activity of the Idria mercury mine is well recorded in Panzano Bay sediments. The Hg  
512 concentrations during the last **500** years are high and significantly exceed the limits imposed by the  
513 Italian SQG, but also ERL and ERM standards (Fig. 3, Table S2). Interestingly, there are some  
514 distinct trends: the concentrations are considerably higher during the 18<sup>th</sup> century and decrease in  
515 the 19<sup>th</sup> and 20<sup>th</sup> century (Fig. 3), corresponding to the history of the mine: the onset of its  
516 significant impact on Panzano Bay occurred in the 18<sup>th</sup> century, when mining activity sharply  
517 increased (Covelli et al., 2012). In the early 19<sup>th</sup> century, metal recovery from the mine improved,  
518 thus releasing less Hg into the river (Covelli et al., 2006).

519 Foraminiferal assemblages in Panzano Bay remained mostly unaffected by these elevated Hg values  
520 throughout the observed period. This implies that speciation of mercury and the bioavailability of  
521 its species are more relevant than its total concentration (Martinez-Colón et al., 2009; **Acquavita et**  
522 **al.**, 2012). Most of the Hg enters Panzano Bay in particulate (unreactive) form, with only a small  
523 fraction of dissolved Hg (Faganeli et al., 2003). This suggests that the mercury species found here  
524 are not accessible to foraminiferal assemblages or, if they are bioavailable, their concentrations do  
525 not reach values sufficient to produce toxic effects.

#### 526 **5.5. The port of Monfalcone**

527 Panzano Bay is also affected by the industrial and port activities of the City of Monfalcone.  
528 Although the first port features were established in the early 19<sup>th</sup> century, the port as it is known  
529 today was designed and built in the 1930s (“CPM”). In 1965, a thermoelectric plant powered by

530 coal and fuel oil was opened in the industrial area ("The Monfalcone Thermoelectric Plant"). One of  
531 the main byproducts of coal and oil combustion are persistent organic pollutants: polycyclic  
532 aromatic hydrocarbons (PAH) and polychlorinated biphenyl (PCB), contaminants that potentially  
533 form highly carcinogenic and mutagenic derivatives (Notar et al., 2001; Pozo et al., 2009).  
534 Moreover, the use of antifouling paints in ports produces trace elements as residues, namely Cu and  
535 Zn, but also Cd, Cr, Ni and Pb (Singh and Turner, 2009).

536 The presence of PAH and PCB in Panzano Bay sediments is probably related to industrial activities  
537 in the port. Their concentrations are low throughout the core and start to increase in the 19<sup>th</sup> century  
538 and especially since the middle of the 20<sup>th</sup> century (Fig. 3), corresponding to the opening of the  
539 thermoelectric plant. However not even the highest measured concentrations exceed Italian SQG, or  
540 ERL and ERM values. In contrast, the concentration peaks of As, Cr, Cu, Ni, Cd, Zn and Pb in the  
541 late 20<sup>th</sup> century reflect not only agricultural sources (see above) but also intensifying port  
542 (antifouling paints) and industrial activities (coal and oil burning).

543 Certain changes in foraminiferal taxonomic composition correlate with the concentrations of  
544 persistent organic pollutants (as detected by RDA in Table 1). These include the decrease of the  
545 genus *Valvulineria* and the increase in the abundance of taxa tolerant to chemical pollution (Fig.  
546 6F), primarily the genus *Ammonia* (Fig. 5). Nevertheless, as the genus *Ammonia* is also known to  
547 tolerate organic enrichment, a synergistic interaction of both processes (chemical and organic  
548 pollution) may have caused such community change.

#### 549 **5.4. The chronology of environmental changes in Panzano Bay over the last 500 years**

550 Integration of foraminiferal and geochemical proxies, combined with a robust chronological  
551 framework based on extensive radiometric dating of mollusk shells, reveals four major phases in the  
552 recent history of Panzano Bay.

553 During the 17<sup>th</sup> and 18<sup>th</sup> century, the effects of port activities, as well as of agriculture in the  
554 surrounding area on the composition of foraminiferal assemblages are negligible. In the early 18<sup>th</sup>

555 century, the release of high amounts of mercury into the environment is related to increasing  
556 activity at the Idrija mercury mine (Faganeli et al., 2003). These high inputs, however, did not affect  
557 foraminiferal communities because the dominant particulate form of Hg is probably not  
558 bioavailable. Environmental conditions in Panzano Bay during this period were probably  
559 characterized by fluctuations in the discharge of the Isonzo River and thus in the amount of organic  
560 matter input. The foraminiferal community was therefore composed predominantly of stress tolerant  
561 species adapted to such unstable conditions.

562 During the 19<sup>th</sup> century, metal recovery at the Idrija mine improved (Covelli et al., 2006) and less  
563 mercury was released into the bay. The onset of maricultural activities here area dates back to this  
564 period, when bivalve farming was established along the eastern coast of the Gulf of Trieste (Melaku  
565 Canu and Solidoro, 2014). This also marks the construction of the port of Monfalcone. The effects  
566 of bivalve farming as well as of agricultural and port activities remain negligible during this period.  
567 The first half of the 20<sup>th</sup> century, however, is marked by rapid technological development. In  
568 Panzano Bay, agricultural, maricultural and port activities intensified. The associated slight increase  
569 of nutrients caused an increase in foraminiferal diversity and a shift in the trophic mode of the  
570 species.

571 In the second part of the 20<sup>th</sup> century, the Monfalcone thermoelectric plant, powered by coal and  
572 fuel oil, became operative. This slightly increased the concentrations of persistent organic pollutants  
573 caused a minor change in the foraminiferal community composition. The nutrient increase that  
574 started in the early 20<sup>th</sup> century extended to this period. As a consequence, the trend of increasing  
575 foraminiferal diversity continues until today.

## 576 **6. Conclusions**

577 The chronology of changes in the geochemical composition of sediments and foraminiferal  
578 assemblages in shallow and sheltered marine embayments of the northern Adriatic reflects  
579 agricultural and industrial development, coastal eutrophication and natural variations. Mercury is a

580 major pollutant in the area, whose concentrations during the last **500** years have significantly  
581 exceeded Italian sediment quality guidelines, ERL and ERM. Surprisingly, these high  
582 concentrations have not affected the ecosystem because the mercury species are not bioavailable to  
583 foraminifera.

584 The impact of agricultural, maricultural and industrial activities intensified during the second half of  
585 the 20<sup>th</sup> century and is ongoing. This is reflected in increasing concentrations of trace elements and  
586 persistent organic pollutants (PAH, PCB), as well as in progressive nutrient enrichment, *as it was*  
587 *presumed within the first two hypotheses. However, mining activity did not produce a progressive*  
588 *enrichment of mercury as anticipated in the second hypothesis, due to the improvement of the*  
589 *methods for the metal recovery. Increased pollutants did not cause a decline of species abundance*  
590 *and diversity as suggested by the third hypothesis, as foraminiferal response to such anthropogenic*  
591 *impacts in Panzano Bay are shaped by their long history of adaptation to elevated trace element*  
592 *concentrations, but also as initial stages of eutrophication can positively affect species richness.*  
593 Consequently, the shift in community composition during the 20<sup>th</sup> century reflects a combination of  
594 factors, including the recorded increase of pollutants, varying natural conditions, but also a natural,  
595 preindustrial predisposition of foraminifera here to tolerate trace elemental pollution.

596 This combination of factors - and therefore our results - are clearly applicable to many other  
597 shallow coastal areas impacted by human activities, which are largely synchronized on a global  
598 scale. Finally, our approach points to the importance of using long term baseline data for evaluating  
599 the environmental and ecological status of present day marine ecosystems.

## 600 **Acknowledgements**

601 This study was carried out within the project: Historical ecology of the northern Adriatic Sea,  
602 funded by the Austrian Science Fund (FWF project P24901) and was supported by the OEAD  
603 “Scientific-Technical Cooperation” between Austria and Croatia (project HR 22/2014). We wish to  
604 thank Jernej Sedmak, captain of the research and working vessel “Manta Bianca”, with which we



605 conducted the whole coring campaign in the northern Adriatic Sea. Daniele Cassin and Roberto  
 606 Zonta from the Institute of Marine Sciences in Venice, Italy, carried out the geochemical analyses.  
 607 Finally, our gratitude goes to Dr. Fabrizio Frontalini and the two anonymous reviewers, whose  
 608 suggestions helped us improve the manuscript.

609

610 **Table 1.** Results of the forward model selection in the redundancy analysis (10000 permutations  
 611 were used). Proportion of variance explained in the community data ( $R^2$ ), F-statistic and P-values  
 612 from permutation tests are reported for (a) models with a single explanatory variable and (b) for the  
 613 effects of a second variable added to the model already including total nitrogen.

| a)          |                    |       |        | b)          |                    |       |        |
|-------------|--------------------|-------|--------|-------------|--------------------|-------|--------|
| Variable    | Variance explained | F     | Pr(>F) | Variable    | Variance explained | F     | Pr(>F) |
| <b>TN</b>   | 0.424              | 5.885 | 0.001  | <b>clay</b> | 0.179              | 1.522 | 0.103  |
| <b>PCB</b>  | 0.410              | 5.553 | 0.001  | <b>Ni</b>   | 0.177              | 1.507 | 0.104  |
| <b>Zn</b>   | 0.339              | 4.105 | 0.007  | <b>Fe</b>   | 0.177              | 1.502 | 0.095  |
| <b>Mn</b>   | 0.339              | 4.101 | 0.002  | <b>Cd</b>   | 0.169              | 1.421 | 0.139  |
| <b>Pb</b>   | 0.328              | 3.899 | 0.011  | <b>Pb</b>   | 0.155              | 1.286 | 0.217  |
| <b>Cd</b>   | 0.324              | 3.835 | 0.003  | <b>PAH</b>  | 0.155              | 1.280 | 0.235  |
| <b>TOC</b>  | 0.323              | 3.825 | 0.008  | <b>Cu</b>   | 0.132              | 1.062 | 0.406  |
| <b>Cu</b>   | 0.266              | 2.903 | 0.036  | <b>TOC</b>  | 0.125              | 0.998 | 0.472  |
| <b>Ni</b>   | 0.248              | 2.644 | 0.047  | <b>Zn</b>   | 0.124              | 0.991 | 0.473  |
| <b>Fe</b>   | 0.225              | 2.322 | 0.057  | <b>PCB</b>  | 0.120              | 0.951 | 0.543  |
| <b>PAH</b>  | 0.225              | 2.320 | 0.063  | <b>Hg</b>   | 0.114              | 0.897 | 0.587  |
| <b>P</b>    | 0.185              | 1.817 | 0.121  | <b>C</b>    | 0.113              | 0.891 | 0.538  |
| <b>Hg</b>   | 0.168              | 1.612 | 0.128  | <b>As</b>   | 0.103              | 0.807 | 0.667  |
| <b>Al</b>   | 0.157              | 1.491 | 0.169  | <b>Mn</b>   | 0.084              | 0.638 | 0.823  |
| <b>Cr</b>   | 0.128              | 1.176 | 0.269  | <b>P</b>    | 0.072              | 0.543 | 0.924  |
| <b>C</b>    | 0.082              | 0.712 | 0.654  | <b>Al</b>   | 0.055              | 0.411 | 0.977  |
| <b>clay</b> | 0.081              | 0.702 | 0.649  | <b>Cr</b>   | 0.052              | 0.381 | 0.981  |
| <b>As</b>   | 0.077              | 0.665 | 0.689  |             |                    |       |        |

614

615

616

617

618

619 **Figure 1.** Study area and location of sampling site in Panzano Bay.

620

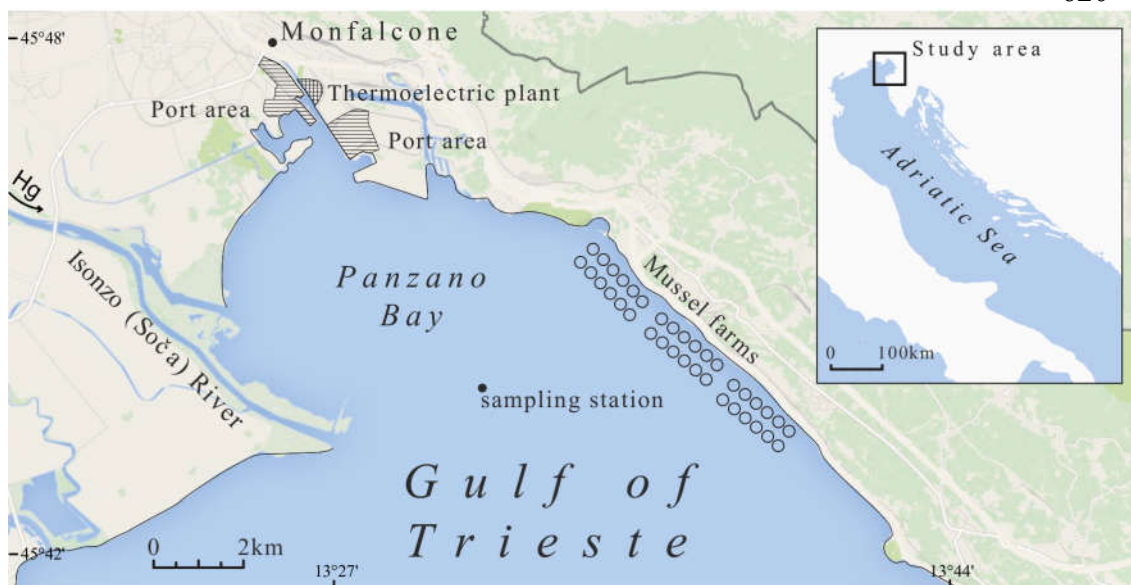

629

630

631

632

633

634

635

636

637

638

639

640

641

642

643

644 **Figure 2.** Radiocarbon calibrated AAR dating of shells of the bivalve species *Varicorbula gibba*.  
 645 The dashed line represent the total range of ages of *V. gibba*, i.e., bounded by the minimum and  
 646 maximum age, the solid line represents the inter-quartile range of ages, i.e., it is bounded by the  
 647 25th and 75th quantiles, and the grey circle refers to the median age. We note that age range and  
 648 inter-quartile age range increase downcore and death assemblages in the basal core increments are  
 649 time-averaged to few centuries, most likely due to bioturbational mixing. Therefore, although  
 650 median age of *V. gibba* in the lowermost (145-150 cm) increment is 1616 AD, interquartile range of  
 651 ages of *V. gibba* in this increment includes shells that died in the 16th century.

652

653

654

655

656

657

658

659

660

661

662

663

664

665

666

667

668

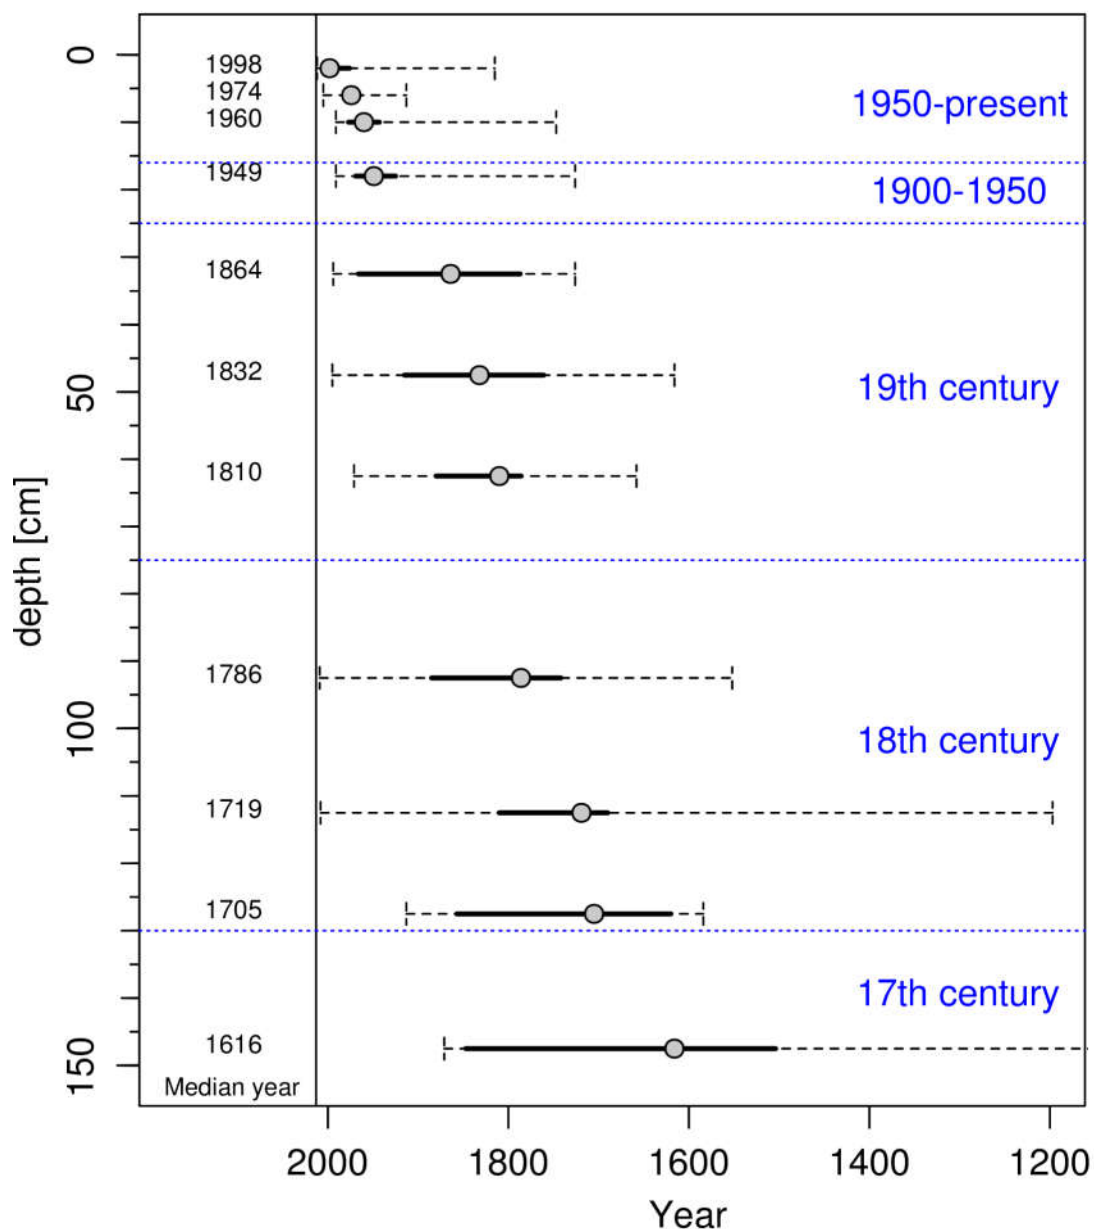

669 **Figure 3.** Vertical changes in grain size, major, minor and trace elements, nutrients and persistent  
 670 organic pollutants.

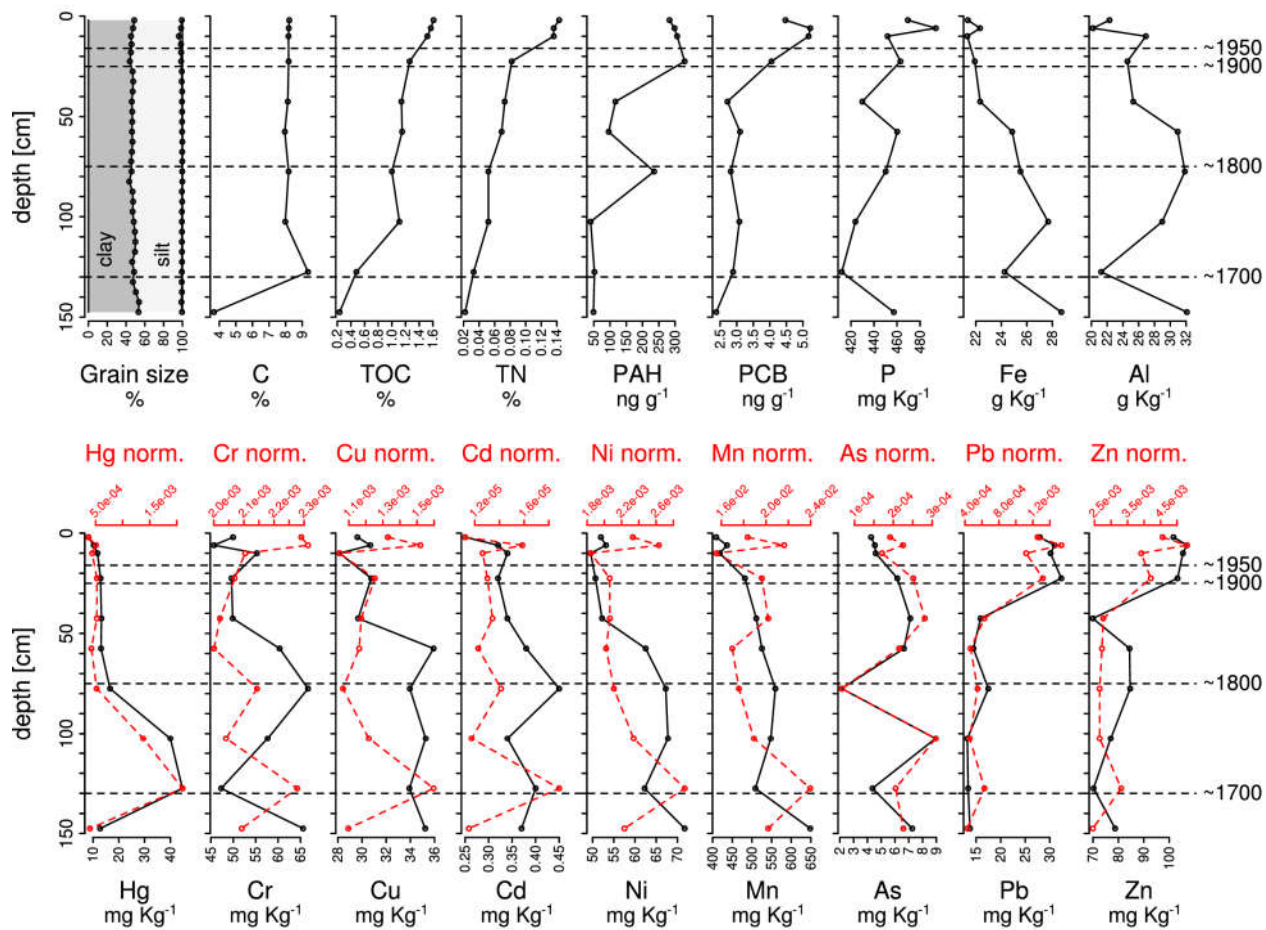

671

672

673

674

675

676

677

678

679 **Figure 4.** Principal component analysis (PCA) based on concentrations of 17 geochemical variables  
680 observed in nine increments shows marked differences between the lower and upper parts of the  
681 core.

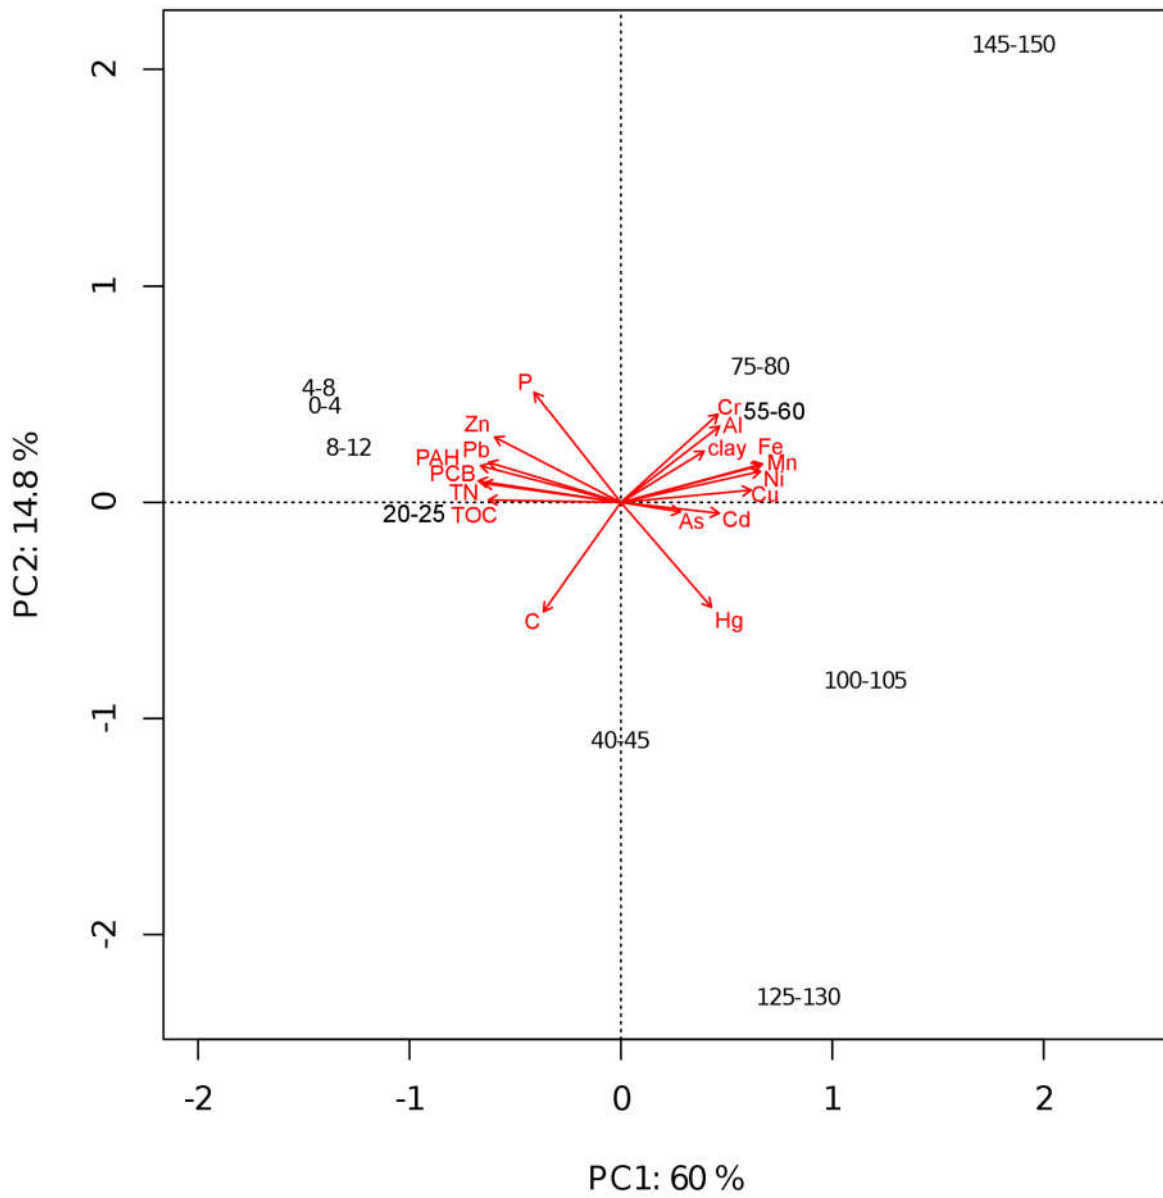

682

683

684

685

686 **Figure 5.** Temporal trends in the relative abundance of foraminiferal suborders (following  
 687 suprageneric classification of Loeblich and Tappan, 1987) and dominant genera and species  
 688 (represented by >2 % of individuals in the pooled data).

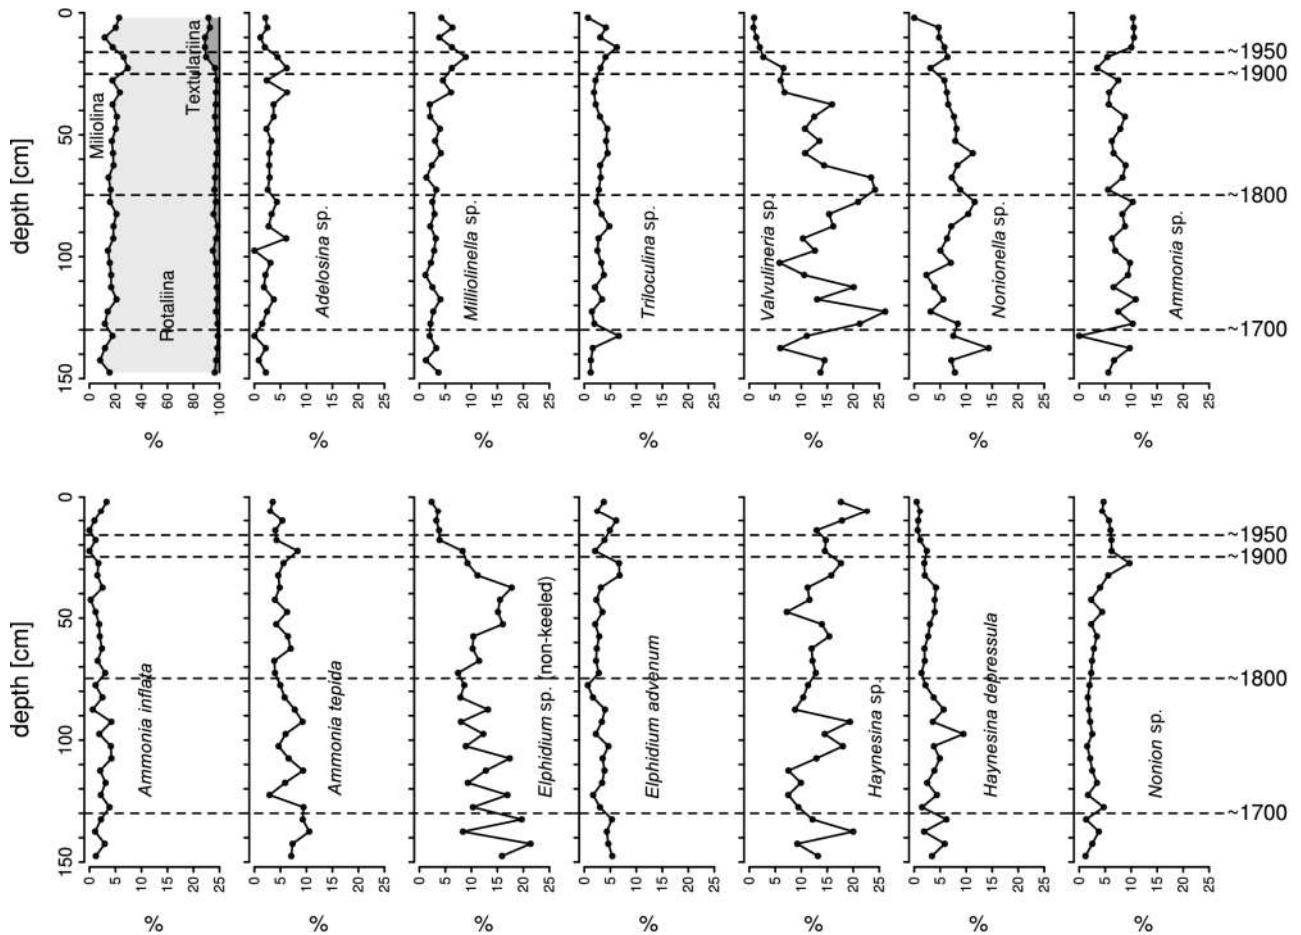

689

690

691

692

693

694

695

696

697



698 **Figure 6. (a)** Temporal trends in species richness, Fisher's  $\alpha$  index, the exponent of the Shannon  
 699 index. Shown are mean values with 95% CI after rarefying to 240 individuals per sample. **(b)**  
 700 Temporal trends in species composition summarized by NMDS axis 1 scores, **(c)** Chronological  
 701 clustering of foraminiferal assemblages (different colors group samples separated by a major  
 702 compositional shift, with the number of temporal bins determined by the broken stick model), **(d)**  
 703 Temporal trends in the relative abundances of substrate relation groups, **(e)** Temporal trends in the  
 704 rarefied species richness of each substrate relation group, **(f)** Temporal trends in the relative  
 705 abundances of two foraminiferal groups according to their tolerance to different types of pollution  
 706 (organic and organic/chemical). Figures D-F are plotted based on data in Table S1.  
 707

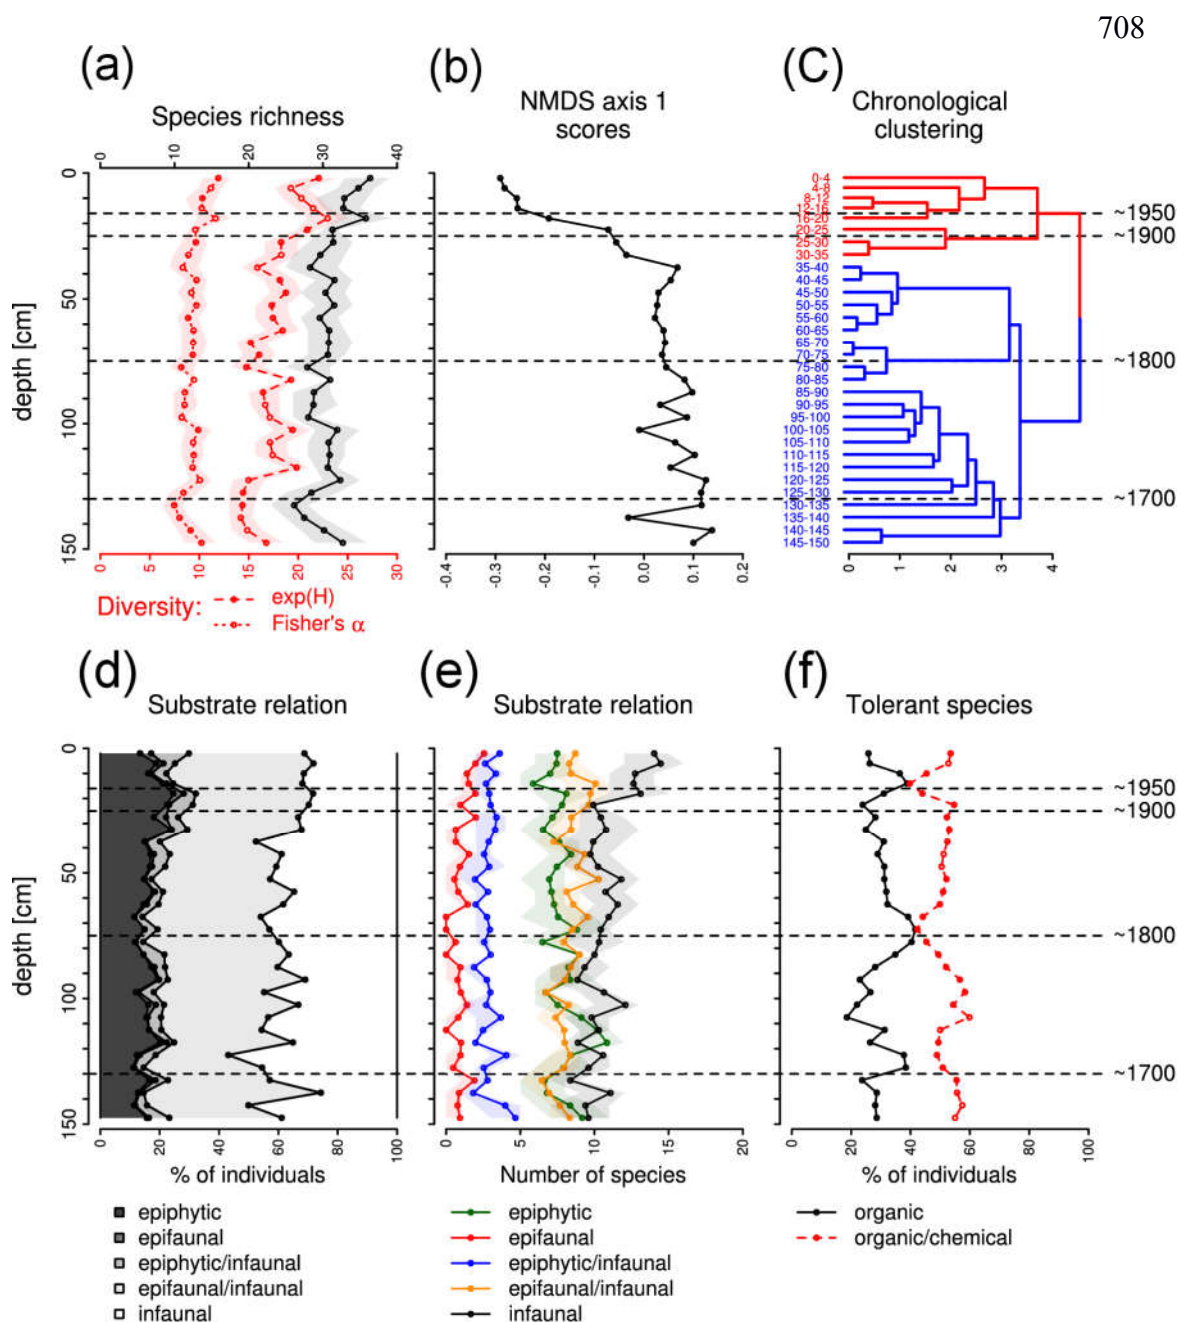

725 **Figure 7.** Non metric multidimensional scaling ordination of the foraminiferal assemblages.

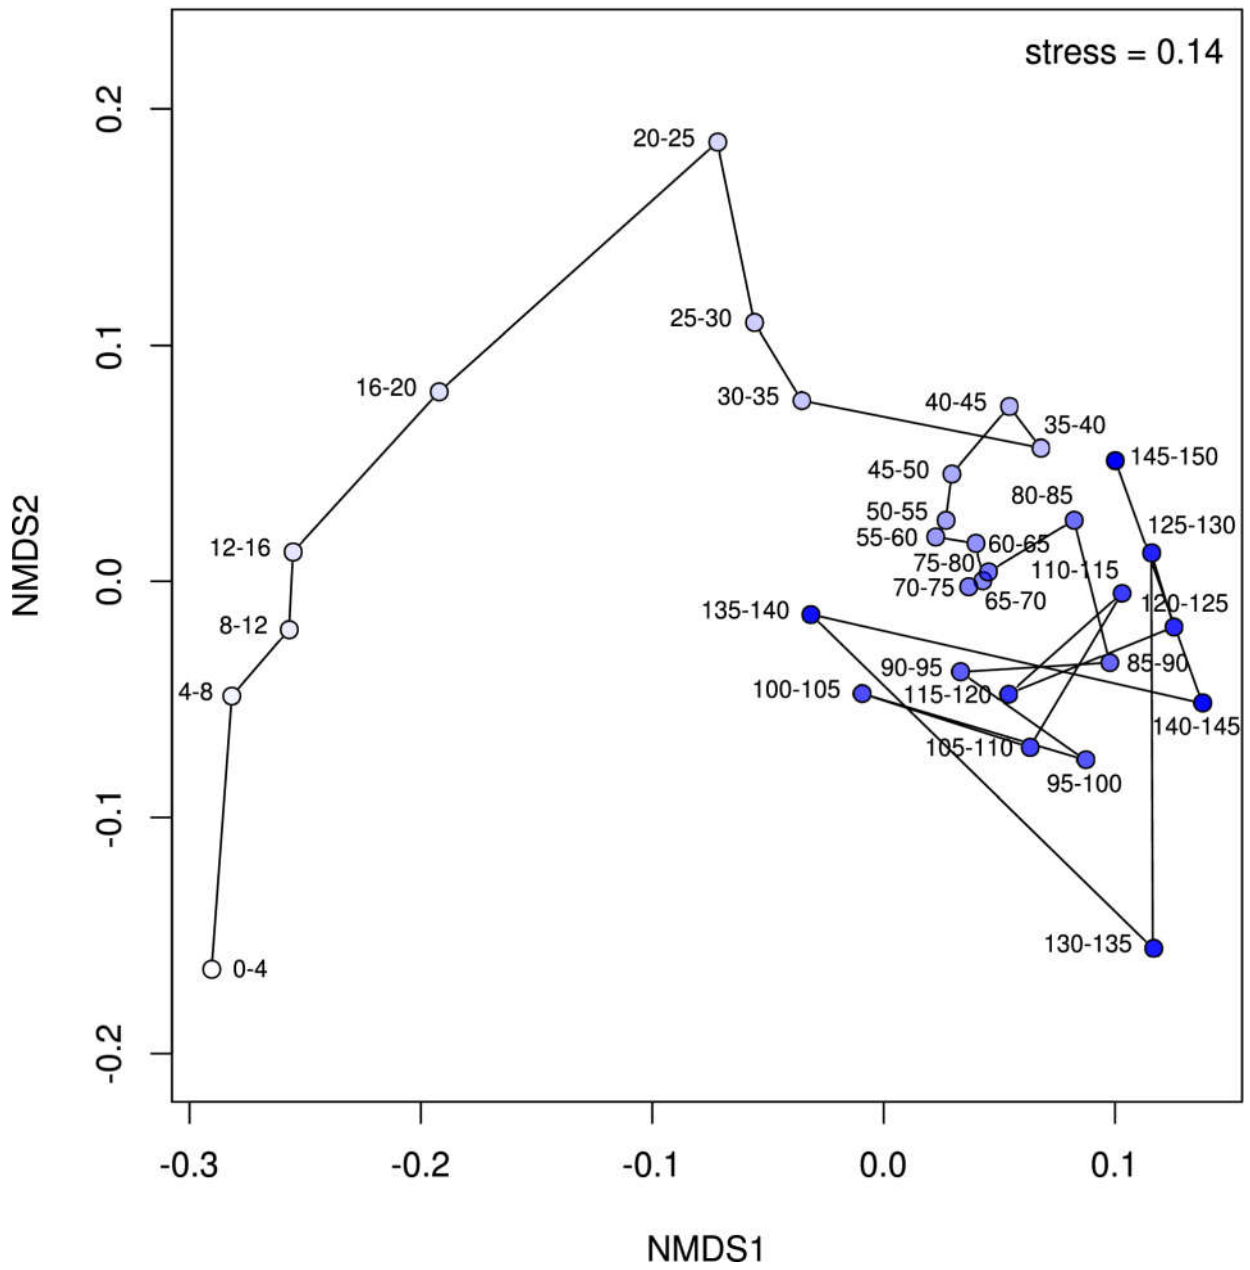

726

727

728

729

730

731

732



733 **Figure S1.** Redundancy analysis triplot of the foraminiferal and geochemical data based on the  
734 results of the forward model selection. Nitrogen concentrations were the only selected variable that  
735 explains 42.4 % of the total variance in the foraminiferal community composition. Given that only  
736 one environmental variable is used, the second axis corresponds to the first principal component  
737 that visualizes the residual compositional variation unconstrained by geochemical data.

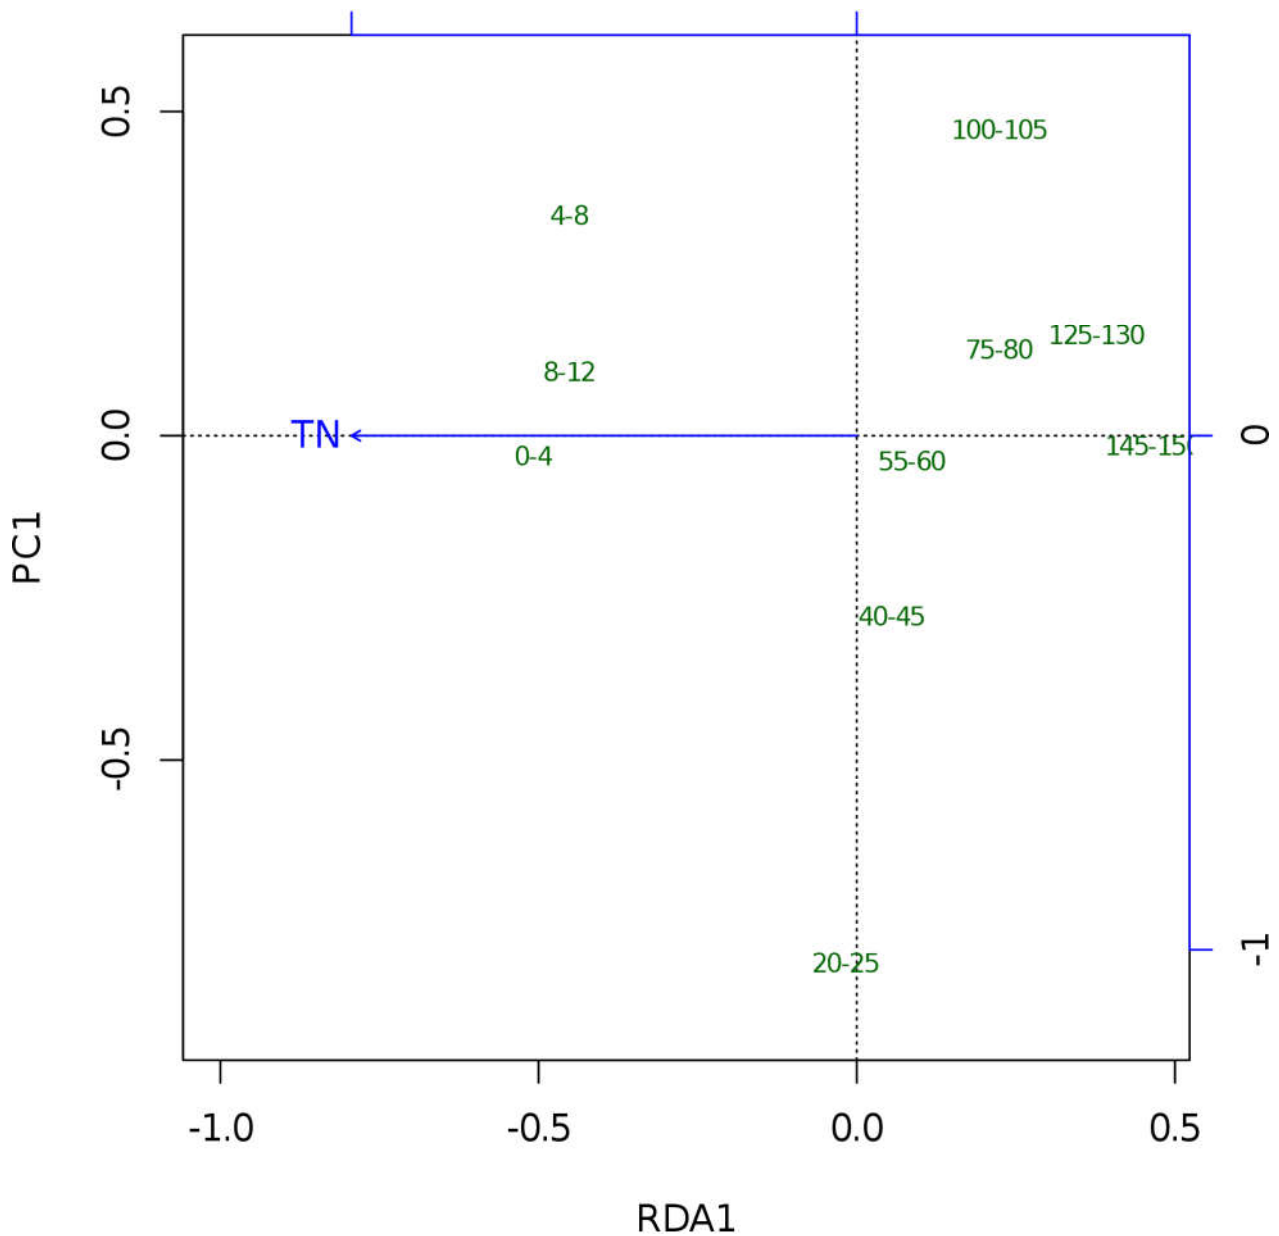

738

739

740

741 **Titles for supplementary tables**

742 **Table S1. (a)** Absolute abundances of foraminiferal species with their ecological characteristics and  
743 tolerances to organic and chemical pollutants, **(b)** full list of all used sources; **(c)** diversity of  
744 foraminiferal community including rarefied species richness, Shannon index, the exponential of  
745 Shannon index and Fisher's  $\alpha$ .

746 **Table S2.** Concentrations of major, minor and trace elements, Italian national sediment quality  
747 guidelines (SQG), ERL and ERM standards.

748 **Table S3.** Pearson's correlation coefficients between clay content, geochemical data, NMDS axis 1  
749 scores and rarefied species richness in the subset of samples with measured elemental  
750 concentrations.

751

752

753

754

755

756

757

758

759

760

761

762

763

764

765

766 **References**

- 767 Acquavita, A., Covelli, S., Emili, A., Berto, D., Faganeli, J., Giani, M., Horvat, M., Koron, N. and  
768 Rampazzo, F.: Mercury in the sediments of the Marano and Grado Lagoon (northern Adriatic  
769 Sea): Sources, distribution and speciation, *Estuar. Coast Shelf Sci.*, 113, 20-31,  
770 doi:10.1016/j.ecss.2012.02.012, 2012.
- 771 Albani, A., Serandrei Barbero, R. and Donnici, S.: Foraminifera as ecological indicators in the  
772 Lagoon of Venice, Italy. *Ecol. Indic.*, 7, 239–253, doi:10.1016/j.ecolind.2006.01.003, 2007.
- 773 Aleffi, I.F., Bettoso, N., Celio, M., Tamberlich, F., Predonzani, S. and Solis-Weiss, V.: Effects of  
774 suspended mussel culture on the macrozoobenthos in the Gulf of Trieste (Northern Adriatic  
775 Sea), *Ann. Ser. Hist. Nat.*, 16/1, 35-146, 2006.
- 776 Allen, A.P., Kosnik, M.A. and Kaufman, D.S.: Characterizing the dynamics of amino acid  
777 racemization using time-dependent reaction kinetics: A Bayesian approach to fitting age-  
778 calibration models. *Quat. Geochronol.* 18, 63-77, doi:10.1016/j.quageo.2013.06.003, 2013.
- 779 Alve, E., Korsun, S., Schönfeld, J., Dijkstra, N., Golikova, E., Hess, S., Husum, K. and Panieri, G.:  
780 Foram-AMBI: A sensitivity index based on benthic foraminiferal faunas from North-East  
781 Atlantic and Arctic fjords, continental shelves and slopes, *Mar. Micropalaeontol.*, 122, 1–12,  
782 doi:10.1016/j.marmicro.2015.11.001, 2016.
- 783 Armynot du Châtelet, E., Debenay, J.P. and Souldard, R.: Foraminiferal Proxies from pollution  
784 monitoring in moderately polluted harbors, *Environ. Pollut.*, 127, 27-40, doi:10.1016/S0269-  
785 7491(03)00256-2, 2004.
- 786 Barmawidjaja, D.M., Jorissen, F.J., Puskaric, S. and Van der Zwaan, G.J.: Microhabitat selection by  
787 benthic foraminifera in the Northern Adriatic Sea, *J. Foraminifer. Res.*, 22, 297-317,  
788 doi:10.2113/gsjfr.22.4.297, 1992.
- 789 Barmawidjaja, D.M., Van der Zwaan, G.J., Jorissen, F.J. and Puškarić, S.: 150 years of  
790 eutrophication in the northern Adriatic Sea: Evidence from a benthic foraminiferal record, *Mar.*  
791 *Geol.*, 122, 367-384, doi:10.1016/0025-3227(94)00121-Z, 1995.

- 792 Barras, C., Jorissen, F.J., Labrune, C., Andral, B. and Boissery, P.: Live benthic foraminiferal  
793 faunas from the French Mediterranean Coast: Towards a new biotic index of environmental  
794 quality, *Ecol. Indic.*, 36, 719-743, doi:10.1016/j.ecolind.2013.09.028, 2014.
- 795 Behrensmeyer, A.K. and Turner, A.: Taxonomic occurrences of Suidae recorded in the  
796 Paleobiology Database, Fossilworks <http://fossilworks.org>, 2013.
- 797 Bennett, K.D.: Determination of the number of zones in a biostratigraphical sequence, *New Phytol.*,  
798 132, 155–170, doi:10.1111/j.1469-8137.1996.tb04521.x, 1996.
- 799 Birks, H.J.B.: Chapter 11: Analysis of stratigraphical data, in: *Tracking environmental change using*  
800 *lake sediments*, Volume 5: Data handling and numerical techniques, edited by: Birks, H.J.B.,  
801 Lotter, A.F., Juggins, S. and Smol, J.P., Springer, Dordrecht doi:10.1007/978-94-007-2745-8,  
802 2012.
- 803 Blanchet, F.G., Legendre, P. and Borcard, D.: Forward selection of explanatory variables, *Ecology*,  
804 89, 2623-2632, doi:10.1890/07-0986.1, 2008.
- 805 Burton, G.A.: Sediment quality criteria in use around the world, *Limnology*, 3, 65–75, doi:  
806 <http://doi.org/10.3739/rikusui.65.117>, 2002.
- 807 Campos, V.: Trace Elements in Pesticides, *Communications in Soil Science and Plant Analysis*, 34:  
808 9-10, doi:10.1081/CSS-120020442, 2003.
- 809 Cibic, T., Blasutto, O., Falconi, C. and Fonda-Umani, S.: Microphytobenthic biomass, species  
810 composition and nutrient availability in sublittoral sediments of the Gulf of Trieste, *Estuar.*  
811 *Coast Shelf Sci.*, 75, 50-62, doi:10.1016/j.ecss.2007.01.020, 2007.
- 812 Cimerman, F. and Langer, M.R.: Mediterranean foraminifera, *Razred za naravoslovne vede, classis*  
813 *IV: Historia Naturalis, Dela-Opera* 30, Slovenska akademija, Ljubljana, 119 pp, 1991.
- 814 Coccioni, R., Gabbianelli, G. and Gentiloni Silverj, D.: Benthic foraminiferal response to heavy  
815 metal pollution in the Goro Lagoon (Italy), in: *First International Conference on*  
816 *Applications of Micropaleontology in Environmental Sciences*, June 15–20, Tel Aviv,

817 Israel, Abstract Volume, 47-48, 1997.

818 Coccioni, R., Frontalini, F., Marsili, A. and Mana, D.: Benthic foraminifera and trace element  
819 distribution: a case-study from the heavily polluted lagoon of Venice (Italy), *Mar. Pollut. Bull.*,  
820 59, 257-267, doi:10.1016/j.marpolbul.2009.08.009, 2009.

821 Covelli, S., Piani, R., Kotnik, J., Horvat, M., Faganeli, J. and Brambati, A.: Behaviour of Hg  
822 species in a microtidal deltaic system: the Isonzo River mouth (northern Adriatic Sea), *Sci.*  
823 *Total. Environ.*, 368, 210-223, doi:10.1016/j.scitotenv.2005.09.089, 2006.

824 Covelli, S., Langone, L., Acquavita, A., Piani, R. and Emili, A.: Historical flux of mercury  
825 associated with mining and industrial sources in the Marano and Grado Lagoon (northern  
826 Adriatic Sea), *Estuar. Coast Shelf Sci.*, 113, 7-19, doi:10.1016/j.ecss.2011.12.038, 2012.

827 Covelli, S., Emili, A. and Acquavita, A.: Natural background values for heavy metals in the  
828 sediments of a contaminated Northern Adriatic lagoon environment: a geochemical perspective,  
829 *E3S Web of Conferences*, 1, 06007, doi:10.1051/e3sconf/20130106007, 2013.

830 Cozzi, S. and Giani, M.: River water and nutrient discharges in the northern Adriatic Sea: Current  
831 importance and long term changes, *Cont. Shelf Res.*, 31, 1881-1893,  
832 doi:10.1016/j.csr.2011.08.010, 2011.

833 "CPM": The history of The port of Monfalcone, <http://www.c-p-m.it/en/history>, website accessed  
834 01.02.2016.

835 Danovaro, R., Gambi, C., Luna, G.M, and Mirto, S.: Sustainable impact of mussel farming in the  
836 Adriatic Sea (Mediterranean Sea): evidence from biochemical, microbial and meiofaunal  
837 indicators, *Mar. Pollut. Bull.*, 49, 325–333, doi:10.1016/j.marpolbul.2004.02.038, 2004.

838 Debenay, J.P., Guillou, J.J., Redois, F. and Geslin, E.: Distribution trends of foraminiferal  
839 assemblages in paralic environments: a base for using foraminifera as bioindicators, in:  
840 *Environmental Micropaleontology: the Application of Microfossils to Environmental Geology*,  
841 edited by Martin, R., Springer, 39-47, doi:10.1007/978-1-4615-4167-7\_3, 2000.

- 842 Debenay, J.P., Tsakiridis, E., Soulard, R. and Gossel, H.: Factors determining the distribution of  
843 foraminiferal assemblages in Port Joinville Harbor (Ile d'Yeu, France): the influence of  
844 pollution, *Mar. Micropaleontol.*, 43, 75-118, doi:10.1016/S0377-8398(01)00023-8, 2001.
- 845 Di Bella, L., Casieri, S. and Carboni, M.G.: Late Quaternary paleoenvironmental reconstruction of  
846 the Tremiti structural high (Central Adriatic Sea) from benthic foraminiferal assemblages,  
847 *Geobios*, 41, 729–742, doi:10.1016/j.geobios.2008.06.001, 2008.
- 848 Di Bella, L. and Casieri, S.: The Late Glacial–Holocene record from Central Adriatic Sea:  
849 Paleoenvironmental reconstruction based on benthic foraminiferal assemblages, *Geobios*, 46,  
850 473–489, doi:10.1016/j.geobios.2013.09.001, 2013.
- 851 Dimiza, M.D., Triantaphyllou, M.V., Koukousioura, O., Hallock, P., Simboura, N., Karageorgis,  
852 A.P. and Papathanasiou, E.: The Foram Stress Index: A new tool for environmental assessment  
853 of soft-bottom environments using benthic foraminifera. A case study from the Saronikos Gulf,  
854 Greece, Eastern Mediterranean, *Ecol. Indic.*, 60, 611–62, doi:10.1016/j.ecolind.2015.07.030,  
855 2016.
- 856 Diz, P. and Francés, G.: Postmortem processes affecting benthic foraminiferal assemblages in the  
857 Ría de Vigo, Spain: implications for paleoenvironmental studies, *J. Foraminifer. Res.*, 39, 166-  
858 179, doi:10.2113/gsjfr.39.3.166, 2009.
- 859 Donnici, S. and Serandrei Barbero, R.: The benthic foraminiferal communities of the northern  
860 Adriatic continental shelf, *Mar. Micropalaeontol.*, 44, 93-123, doi:10.1016/S0377-  
861 8398(01)00043-3, 2002.
- 862 Faganeli, J., Horvat, M., Covelli, S., Fajon, V., Logar, M., Lipej, L. and Cermelj, B.: Mercury and  
863 methylmercury in the Gulf of Trieste (northern Adriatic Sea), *Sci. Total Environ.*, 304, 315-326,  
864 doi:10.1016/S0048-9697(02)00578-8, 2003.
- 865 Ferraro, L., Sprovieri, M., Alberico, I., Lirer, F., Prevedello, L. and Marsella, E.: Benthic  
866 foraminifera and heavy metals distribution: a case study from the Naples Harbour (Tyrrhenian

- 867 Sea, Southern Italy), *Environ. Pollut.*, 142, 274–284, doi:10.1016/j.envpol.2005.10.026, 2006.
- 868 Finch, H.J.S., Samuel, A.M. and Lane, G.P.F.: *Lockhart & Wiseman's Crop husbandry including*  
869 *grassland* (9th ed), Fertilisers and manures. Woodhead Publishing, 63-91, 2014.
- 870 Fossato, V.U., Campesan, G., Craboledda, L., Dolci, F. and Stocco, G.: Organic micropollutants  
871 and trace metals in water and suspended particulate matter, in: *Venice Lagoon Ecosystem*,  
872 *Unesco/Murst*, Vol. 1, 8 p, edited by Lasserre, P. and Marzollo, A., 1996.
- 873 Fossato, V.U., Campesan, G., Dolci, F. and Stocco, G.: Trends in chlorinated hydrocarbons and  
874 heavy metals in sediments of Venetian canals, *Rapp. Comm. Int. Mer Médit.*, 35, 258-259,  
875 1998.
- 876 Franzo, A., Cibic, T., Del Negro, P. and Solidoro, C.: Microphytobenthic response to mussel farm  
877 biodeposition in coastal sediments of the northern Adriatic Sea, *Mar. Pollut. Bull.*, 79, 379-388,  
878 doi:10.1016/j.marpolbul.2013.11.002, 2014.
- 879 Franzo, A., Cibic, T. and Del Negro, P.: Integrated approach for the assessment of the benthic  
880 ecosystem functioning at a coastal site in the northern Adriatic Sea, *Cont. Shelf Res.*, 121, 35-  
881 47, doi:10.1016/j.csr.2015.12.005, 2015.
- 882 Frontalini, F. and Coccioni, R.: Benthic foraminifera for heavy metal pollution monitoring: a case  
883 study from the central Adriatic Sea coast of Italy, *Estuar. Coast Shelf Sci.*, 76, 404-417,  
884 doi:10.1016/j.ecss.2007.07.024, 2008.
- 885 Frontalini, F. and Coccioni, R.: Benthic foraminifera as bioindicators of pollution: A review of  
886 Italian research over the last three decades, *Rev. Micropaleontolog*, 54, 115-127,  
887 doi:10.1016/j.revmic.2011.03.001, 2011.
- 888 Frontalini, F., Buosi, C., Da Pelo, S., Coccini, R., Cherchi, A. and Bucci, C.: Benthic foraminifera  
889 as bio-indicators of trace element pollution in the heavily contaminated Santa Gilla Lagoon  
890 (Cagliari, Italy), *Mar. Pollut. Bull.*, 58, 858-877, doi:10.1016/j.marpolbul.2009.01.015, 2009.
- 891 Gallmetzer, I., Haselmair, A., Stachowitsch, M. and Zuschin, M.: An innovative piston corer for

892 large volume sediment samples, *Limnol. Oceanog. Methods*, doi: 10.1002/lom3.10124, 2016, in  
893 press.

894 Hall, P.O.J., Anderson, L.G., Holby, O., Kollberg, S. and Samuelsson, M.O.: Chemical fluxes and  
895 mass balances in a marine fish cage farm. I. Carbon, *Mar. Ecol. Prog. Ser.*, 61, 61-73,  
896 doi:10.3354/meps061061, 1990.

897 Hall, P.O.J., Holby, O., Kollberg, S. and Samuelsson, M.O.: Chemical fluxes and mass balances in  
898 a marine fish cage farm. IV. Nitrogen, *Mar. Ecol. Prog. Ser.*, 89, 81-91,  
899 doi:10.3354/meps089081, 1990.

900 He, Z.L., Yang, X.E. and Stoffella, P.J.: Trace elements in agroecosystems and impacts on the  
901 environment, *J. Trace Elem. Med. Bio.*, 19, 125-140, doi:10.1016/j.jtemb.2005.02.010, 2005.

902 Heath, E., Ogrinc, N., Faganeli, J. and Covelli, S.: Sedimentary record of polycyclic aromatic  
903 hydrocarbons in the Gulf of Trieste (Northern Adriatic Sea), *Water Air Soil Poll.: Focus*, 6(5-6),  
904 605-614, doi: 10.1007/s11267-006-9045-2, 2006.

905 Hedges, J.I. and Stern, J.H.: Carbon and nitrogen determination of carbonate-containing solids,  
906 *Limnol. Oceanog.*, 29, 657-663, doi:10.4319/lo.1984.29.3.0657, 1984.

907 Hill, M.: Diversity and evenness: a unifying notation and its consequences, *Ecology*, 54, 427-432,  
908 doi:10.2307/1934352, 1973.

909 Hohenegger, H., Piller, W.E. and Baal, C.: Horizontal and vertical spatial microdistribution of  
910 foraminifers in the shallow subtidal Gulf of Trieste, northern Adriatic Sea, *J. Foraminifer., Res.*,  
911 23, 79-101, doi:10.2113/gsjfr.23.2.79, 1993.

912 Holby, O. and Hall, P.O.J.: Chemical fluxes and mass balances in a marine fish cage farm. II.  
913 Phosphorus, *Mar. Ecol. Prog. Ser.*, 70, 263-272, doi:10.3354/meps070263, 1991.

914 Horvat, M., Covelli, S., Faganeli, J., Logar, M., Mandić, V., Rajar, R., Širca, A. and Žagar, D.:  
915 Mercury in contaminated coastal environments; a case study: the Gulf of Trieste, *Sci. Total*  
916 *Environ.*, 237/238, 43-56, doi:10.1016/S0048-9697(99)00123-0, 1999.



917 IAEA: World-wide and regional intercomparison for the determination of organochlorine  
918 compounds, petroleum hydrocarbons and sterols in sediment sample. International Atomic  
919 Energy Agency I.A.E.A- 417, 2001.

920 IAEA: World-wide and regional intercomparison for the determination of organochlorine  
921 compounds, petroleum hydrocarbons and sterols in sediment sample. International Atomic  
922 Energy Agency I.A.E.A- 159, 2007.

923 IAEA: World-wide and regional intercomparison on the determination of organochlorine  
924 compounds, polybrominated diphenyl ethers and petroleum hydrocarbons in sediment sample.  
925 International Atomic Energy Agency I.A.E.A- 459, 2012.

926 Jorissen, F.J.: The distribution of benthic foraminifera in the Adriatic Sea, *Mar. Micropaleontol.*,  
927 12, 21-48, doi: 10.1016/0377-8398(87)90012-0, 1987.

928 Jorissen, F.J.: Benthic foraminifera from the Adriatic Sea: principles of phenotypic variation,  
929 *Utrecht Micropaleontol. Bull.*, 37, 1-174, 1988.

930 Jorissen, F.J., Barmawidjaja, D.M., Puskaric, S. and Van der Zwaan, G.J.: Vertical distribution of  
931 benthic foraminifera in the northern Adriatic Sea: The relation with the organic flux, *Mar.*  
932 *Micropaleontol.*, 19, 131-146, doi:10.1016/0377-8398(92)90025-F, 1992.

933 Jost, L.: Entropy and diversity, *Oikos*, 113, 363-375, doi:10.1111/j.2006.0030-1299.14714.x, 2006.

934 Juggins, S.: Analysis of Quaternary Science Data, R package version 0.9-5. [http://cran.r-](http://cran.r-project.org/package=rrioja)  
935 [project.org/package=rrioja](http://cran.r-project.org/package=rrioja), 2015.

936 Kaufman, D.S. and Manley, W.F.: A new procedure for determining DL amino acid ratios in fossils  
937 using reverse phase liquid chromatography, *Quat. Sci. Rev.*, 17, 987–1000, doi:10.1016/S0277-  
938 3791(97)00086-3, 1998.

939 Langer, M.R.: Epiphytic Foraminifera, *Mar. Micropaleontol.*, 20, 235-265, doi:10.1016/0377-  
940 8398(93)90035-V, 1993.

941 Langlet, D., Geslin, E., Baal, C., Metzger, E., Lejzerowicz, F., Riedel, B., Zuschin, M., Pawlowski,

942 J., Stachowitsch, M. and Jorissen, F.J.: Foraminiferal survival after one year of experimentally  
943 induced anoxia, *Biogeosciences*, 10, 7463-7480, doi:10.5194/bg-10-7463-2013, 2013.

944 Langlet, D., Baal, C., Geslin, E., Metzger, E., Zuschin, M., Riedel, B., Risgaard-Petersen, N.,  
945 Stachowitsch, M. and Jorissen, F.J.: Foraminiferal specific responses to experimentally induced  
946 anoxia in the Adriatic Sea, *Biogeosciences*, 11, 1775-1797, doi: 10.5194/bg-11-1775-2014,  
947 2014.

948 Le Cadre, V. and Debenay, J.P.: Morphological and cytological responses of *Ammonia*  
949 (foraminifera) to copper contamination: Implication for the use of foraminifera as bioindicators  
950 of pollution, *Environ. Pollut.*, 143, 304-317, doi:10.1016/j.envpol.2005.11.033, 2006.

951 Loeblich, Jr A.R. and Tappan, H.: *Foraminiferal Genera and their Classification*, Van Nostrand  
952 Reinhold, New York, 970 pp + 847 pls, doi:10.1007/978-1-4899-5760-3, 1987.

953 Lotze, H.K., Lenihan, H.S., Bourque, B.J., Bradbury, R.H., Cooke, R.G., Kay, M.C., Kidwell, S.M.,  
954 Kirby, M.X., Peterson, C.H. and Jackson, J.B.C.: Depletion, degradation, and recovery potential  
955 of estuaries and coastal seas, *Science*, 312, 1806-1809, doi:10.1126/science.1128035, 2006.

956 Mantzavrakos, E., Kornaros, M., Lyberatos, G. and Kaspiris, P.: Impacts of a marine fish farm in  
957 Argolikos Gulf (Greece) on the water column and the sediment, *Desalination*, 210, 110-124,  
958 doi:10.1016/j.desal.2006.05.037, 2007.

959 Martinez-Colón, M., Hallock, P. and Green-Ruíz, C.: Strategies for using shallow water benthic  
960 foraminifers as bioindicators of potentially toxic elements: a review, *J. Foraminifer. Res.*, 39,  
961 278-299, doi:10.2113/gsjfr.39.4.278, 2009.

962 Mateu-Vicens, G., Box, A., Deudero, S. and Rodriguez, B.: Comparative analysis of epiphytic  
963 foraminifera in sediments colonized by seagrass *Posidonia oceanica* and invasive macroalgae  
964 *Caulerpa* spp., *J. Foraminifer. Res.*, 40, 134-147, doi:10.2113/gsjfr.40.2.134, 2010.

965 Melaku Canu, D. and Solidoro, C.: Socio-economic analysis and stakeholder involvement: Mussel-  
966 farming in the Gulf of Trieste, *Mar. Policy.*, 43, 55-62, doi: 10.1016/j.marpol.2013.03.022,

967 2014.

968 Melis, R. and Covelli, S.: Distribution and morphological abnormalities of recent foraminifera in  
969 the Marano and Grado Lagoon (North Adriatic Sea, Italy), *Mediterr. Mar. Sci.*, 14, 432-450,  
970 doi:10.12681/mms.351, 2013.

971 Miklavčič, V.: Mercury in the town of Idrija (Slovenia) after 500 years of mining and smelting, in:  
972 Mercury in contaminated sites, characterisation, risk assessment and remediation, 259-269,  
973 edited by: Ebinghaus, R., Turner, R.R., de Lacerda, L.D., Vasiliev, O. and Salomons, W., Berlin  
974 Heidelberg-New York: Springer-Verlag, doi:10.1007/978-3-662-03754-6\_14, 1999.

975 Mook, W.T., Chakrabarti, M.H., Aroua, M.K., Khan, G.M., Ali, B.S., Islam, M.S. and Abu Hassan,  
976 M.A.: Removal of total ammonia nitrogen (TAN), nitrate and total organic carbon (TOC) from  
977 aquaculture wastewater using electrochemical technology. A review, *Desalination*, 285, 1-13,  
978 doi:10.1016/j.desal.2011.09.029, 2012.

979 Murray, J.W.: Ecology and palaeoecology of benthic foraminifera. John Wiley and Sons Inc, New  
980 York, 402 pp doi:10.1016/0031-0182(92)90153-V, 1991.

981 Murray, J.W.: Ecology and applications of benthic foraminifera. Cambridge University Press,  
982 Cambridge, 426 pp, <http://dx.doi.org/10.1017/CBO9780511535529>, 2006.

983 Naeher, S., Geraga, M., Papatheodorou, G., Ferentinos, G., Kaberi, H. and Schubert, C.J.:  
984 Environmental variations in a semi-enclosed embayment (Amvrakikos Gulf, Greece) -  
985 reconstructions based on benthic foraminifera abundance and lipid biomarker pattern,  
986 *Biogeosciences*, 9, 5081-5094, doi:10.5194/bg-9-5081-2012, 2012.

987 Notar, M., Leskovšek, H. and Faganeli, J.: Composition, Distribution and Sources of Polycyclic  
988 Aromatic Hydrocarbons in Sediments of the Gulf of Trieste, Northern Adriatic Sea, *Mar. Pollut.*  
989 *Bull.*, 42, 36-44, doi:10.1016/S0025-326X(00)00092-8, 2001.

990 Ogorelec, B., Mišič, M. and Faganeli, J.: Marine geology of the Gulf of Trieste (northern Adriatic):  
991 Sedimentological aspects, *Mar. Geol.*, 99, 79-92, doi:10.1016/0025-3227(91)90084-H, 1991.

- 992 Oksanen, J., Blanchet, F.G., Kindt, R., Legendre, P., Minchin, P.R., O'Hara, R.B., Simpson, G.L.,  
993 Solymos, P., Stevens, M.H.H. and Wagner, H.: Community Ecology Package. R package  
994 version 2.3-2. <http://CRAN.R-project.org/package=vegan>, 2015.
- 995 Piva, A., Asioli, A., Trincardi, F., Schneider, R.R. and Vigliotti, L.: Late-Holocene climate  
996 variability in the Adriatic Sea (Central Mediterranean), *Holocene*, 18, 153-167,  
997 doi:10.1177/0959683607085606, 2008.
- 998 Popadić, A., Vidović, J., Čosović, V., Medaković, D., Dolenc, M. and Felja, I.: Impact evaluation  
999 of the industrial activities in the Bay of Bakar (Adriatic Sea, Croatia): recent benthic  
1000 foraminifera and heavy metals, *Mar. Pollut. Bull.*, 76, 333-348,  
1001 doi:10.1016/j.marpolbul.2013.09.039, 2013.
- 1002 Pozo, K., Lazzarini, D., Perra, G., Volpi, V., Corsolini, S. and Focardi, S.: Levels and spatial  
1003 distribution of polychlorinated biphenyls (PCBs) in superficial sediment from 15 Italian  
1004 Marine Protected Areas (MPA), *Mar. Pollut. Bull.*, 58, 765-786,  
1005 doi:10.1016/j.marpolbul.2009.03.003, 2009.
- 1006 Raccanelli, S., Libralato, S. and Tundo, S.: Fate of Persistent Organic Pollutants in the Venice  
1007 Lagoon: from the Environment to Human Beings Through Biological Exploitation?, in:  
1008 NATO Science for Peace and Security Series C: Environmental Security, 15-25, edited by:  
1009 Bahadir, A.M. and Duca, G., doi:10.1007/978-90-481-2903-4\_2, 2009.
- 1010 Rampazzo, F., Berto, D., Giani, M., Brigolin, D., Covelli, S., Cacciatore, F., Boscolo Brusà, R.,  
1011 Bellucci, L.G. and Pastres, R.: Impact of mussel farming on sedimentary geochemical properties  
1012 of a Northern Adriatic area influenced by freshwater inflows, *Estuar. Coast Shelf Sci.*, 129, 49-  
1013 58, doi:10.1016/j.ecss.2013.06.001, 2013.
- 1014 R Core Team: A Language and Environment for Statistical Computing. R Foundation for Statistical  
1015 Computing, Vienna, Austria. <http://www.R-project.org/>, 2014.
- 1016 Reimer, P., Bard, E., Bayliss, A., Beck, J., Blackwell, P., Bronk Ramsey, C., Buck, C., Cheng, H.,

- 1017 Edwards, R., Friedrich, M., Grootes, P., Guilderson, T., Haflidason, H., Hajdas, I., Hatté, C.,  
1018 Heaton, T., Hoffmann, D., Hogg, A., Hughen, K., Kaiser, K., Kromer, B., Manning, S., Niu, M.,  
1019 Reimer, R., Richards, D., Scott, E., Southon, J., Staff, R., Turney, C. and Van der Plicht, J.:  
1020 IntCal13 and Marine13 radiocarbon age calibration curves 0–50,000 years cal BP. *Radiocarbon*  
1021 55:1869-1887 doi:10.2458/azu\_js\_rc.55.16947, 2013.
- 1022 Romano, E., Bergamin, L., Finoia, M.G., Carboni, M.G., Ausili, A. and Gabellini, M.: Industrial  
1023 pollution at Bagnoli (Naples, Italy): benthic foraminifera as a tool in integrated programs of  
1024 environmental characterization, *Mar. Pollut. Bull.*, 56, 439-457.  
1025 doi:10.1016/j.marpolbul.2007.11.003, 2008.
- 1026 Romano, E., Langone, L., Frignani, M., Albertazzi, S., Focaccia, P., Bellucci, L.C. and Ravaoli,  
1027 M.: Historical pattern and mass balance of trace metals in sediments of the northwestern  
1028 Adriatic Sea Shelf, *Mar. Pollut. Bull.*, 76, 32-41, doi:10.1016/j.marpolbul.2013.09.034, 2013.
- 1029 Schönfeld, J.: History and development of methods in Recent benthic foraminiferal studies, *J.*  
1030 *Micropaleontol.*, 31, 53–72, doi: 10.1144/0262-821X11-008, 2012.
- 1031 Shepard, F.P.: Nomenclature based on sand-silt-clay ratios, *J. Sediment. Petrol.*, 24, 151-158,  
1032 doi:10.1306/D4269774-2B26-11D7-8648000102C1865D. 1954.
- 1033 Siani, G., Paterne, M., Arnold, M., Bard, E., Metivier, B., Tisnerat, N. and Bassinot, F.:  
1034 Radiocarbon reservoir ages in the Mediterranean Sea and Black Sea, *Radiocarbon*, 42, 271-280,  
1035 2000.
- 1036 Singh, N. and Turner, A.: Trace metals in antifouling paint particles and their heterogeneous  
1037 contamination of coastal sediments, *Mar. Pollut. Bull.*, 58, 559-564,  
1038 doi:10.1016/j.marpolbul.2008.11.014, 2009.
- 1039 Solis-Weiss, V., Aleffi, F., Bettoso, N., Rossin, P. and Orel, G.: The benthic macrofauna at the  
1040 outfalls of the underwater sewage discharges in the Gulf of Trieste (northern Adriatic Sea),  
1041 *Annales Ser. Hist. Nat.*, 17, 1-16, 2007.

- 1042 Stuiver, M. and Reimer, P.J.: Extended 14C data base and revised CALIB 3.0 C age calibration  
1043 program, *Radiocarbon*, 35, 215–230, 1993.
- 1044 “The Monfalcone Thermoelectric Plant”: The description of the plant and the history of the  
1045 thermoelectric production, [http://www.a2a.eu/en/plants\\_networks/thermoelectric/monfalcone](http://www.a2a.eu/en/plants_networks/thermoelectric/monfalcone),  
1046 website accessed 15.01.2016.
- 1047 Turk, V., Mozetič, P. and Malej, A.: Overview of eutrophication-related events and another  
1048 irregular episodes in Slovenian Sea (Gulf of Trieste, Adriatic Sea), *Annales Ser. Hist. Nat.*, 17,  
1049 197-216, 2007.
- 1050 USEPA (Environment Protection Agency of United State of America). Method 3051A, Microwave  
1051 assisted acid digestion of sediments, sludges, soils and oils, 1994A.
- 1052 USEPA (Environment Protection Agency of United State of America). Method 200.7,  
1053 Determination of Metals and Trace Elements in water and Wastes by Inductively Coupled  
1054 Plasma-Atomic Emission Spectrometry, 1994B.
- 1055 USEPA (Environment Protection Agency of United State of America). Method 245.1, Mercury  
1056 (Manual Cold Vapor Technique), 1976.
- 1057 Van der Zwaan, G.J. and Jorissen, F.J.: Biofacial patterns in river-induced shelf anoxia, in: *Modern  
1058 and Ancient Continental Shelf Anoxia*. Geological Society, Spec. Publ., 58, 65–82 edited by  
1059 Tyson, R.V. and Pearson T.H., doi:10.1144/GSL.SP.1991.058.01.05, 1991.
- 1060 Vaniček, V., Juračić, M., Bajraktarević, Z. and Čosović, V.: Benthic foraminiferal assemblages in a  
1061 restricted environment – An example from the Mljet Lakes (Adriatic Sea, Croatia), *Geol. Croat.*,  
1062 53, 269–279, url: <http://hrcak.srce.hr/3863>, 2000.
- 1063 Vidović, J., Čosović, V., Juračić, M. and Petricioli, D.: Impact of fish farming on foraminiferal  
1064 community, Drvenik Veliki Island, Adriatic Sea, Croatia, *Mar. Pollut. Bull.*, 58, 1297-1309,  
1065 doi:10.1016/j.marpolbul.2009.04.031, 2009.
- 1066 Vidović, J., Dolenc, M., Dolenc, T., Karamarko, V. and Žvab Rožič, P.: Benthic foraminifera

- 1067 assemblages as elemental pollution bioindicator in marine sediments around fish farm (Vrgada  
1068 Island, Central Adriatic, Croatia), *Mar. Pollut. Bull.*, 83, 198-213,  
1069 doi:10.1016/j.marpolbul.2014.03.051, 2014.
- 1070 Ward, J.N., Pond, D.W. and Murray, J.W.: Feeding of benthic foraminifera on diatoms and sewage-  
1071 derived organic matter: an experimental application of lipid biomarker techniques, *Mar.*  
1072 *Environ. Res.*, 56, 515-530, doi:10.1016/S0141-1136(03)00040-0, 2003.
- 1073 Yasuhara, M., Hunt, G., Breitburg, D., Tsujimoto, A. and Katsuki, K.: Human-induced marine  
1074 ecological degradation: micropaleontological perspectives, *Ecol. Evol.*, 2, 3242–3268,  
1075 doi:10.1002/ece3.425, 2012.
- 1076 Zuschin, M. and Piller, W.E.: Sedimentology and facies zonation along a transect through the Gulf  
1077 of Trieste, Northern Adriatic Sea, *Beitr. Palaeontol.*, 18, 75-114, 1994.
- 1078 Zuschin, M., Stachowitsch, M., Pervesler, P. and Kollmann, H.: Structural features and taphonomic  
1079 pathways of a high-biomass epifauna in the northern Gulf of Trieste, Adriatic Sea, *Lethaia*, 32,  
1080 299-317, doi:10.1111/j.1502-3931.1999.tb00548.x, 1999.
